# Supplementary material for: The promotion effect of π-π interactions in Pd NPs catalysed selective hydrogenation
Source: Research Square preprint supplement (doi:10.21203/rs.3.rs-871287/v1), 2021-09-09
Supplement: Supplementary file 1 [file e6efc21effe3e4c2a661f3ec.docx]

**The promotion effect of π-π interactions in Pd NPs catalysed selective hydrogenation**

Miao Guo2#, Sanjeevi Jayakumar2#, Xiangtao Kong3, Chunzhi Li2,4, He Li2, Jian Chen1, Mengfei Luo1* & Qihua Yang1, 2*

1 Key Laboratory of the Ministry of Education for Advanced Catalysis Materials, Zhejiang Key Laboratory for Reactive Chemistry on Solid Surfaces, Institute of Physical Chemistry, Zhejiang Normal University, Jinhua 321004, China.

2 State Key Laboratory of Catalysis, Dalian Institute of Chemical Physics, Chinese Academy of Sciences, Dalian 116023, China.

3 College of Chemistry and Chemical Engineering, Anyang Normal University, Anyang 455000, China.

4 University of Chinese Academy of Sciences, Beijing 100039, China.

# These authors contributed equally to this work.

KEYWORDS: Heterogeneous hydrogenation, COFs, Pd NPs, Acetophenone, Pyrene, Weak interactions.

1. **Supplementary methods**

We derive the kinetic expressions for the proposed mechanisms of AP hydrogenation in the main text based on the conventional Langmuir–Hinshelwood model with the following assumptions:

1. The AP molecules and hydrogen are adsorbed on different sites;
2. AP or intermediates concentration change results a negligible change in reaction rate.

In the following, the hydrogenation kinetic models of AP hydrogenation to phenyl ethanol involve adsorption, surface reaction and desorption as follows:


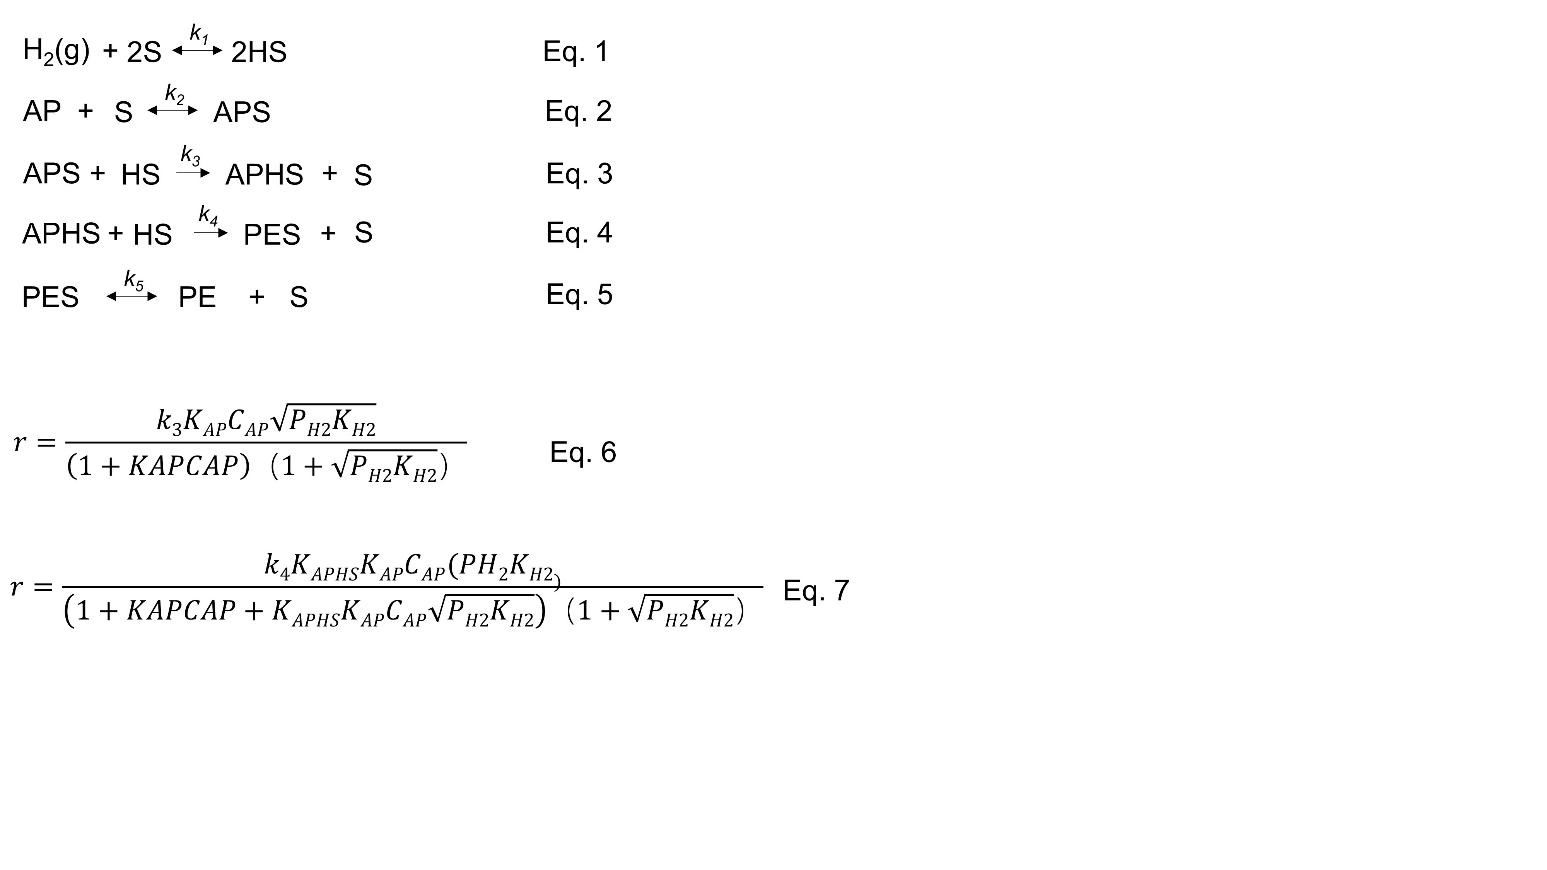


Where *ki* is rate constant, and S represents empty Pd sites.

Assuming adsorption and desorption steps to be rate-determining does not lead to rate expressions consistent with the observed reaction orders.

When the first hydrogenation of AP is the RDS:


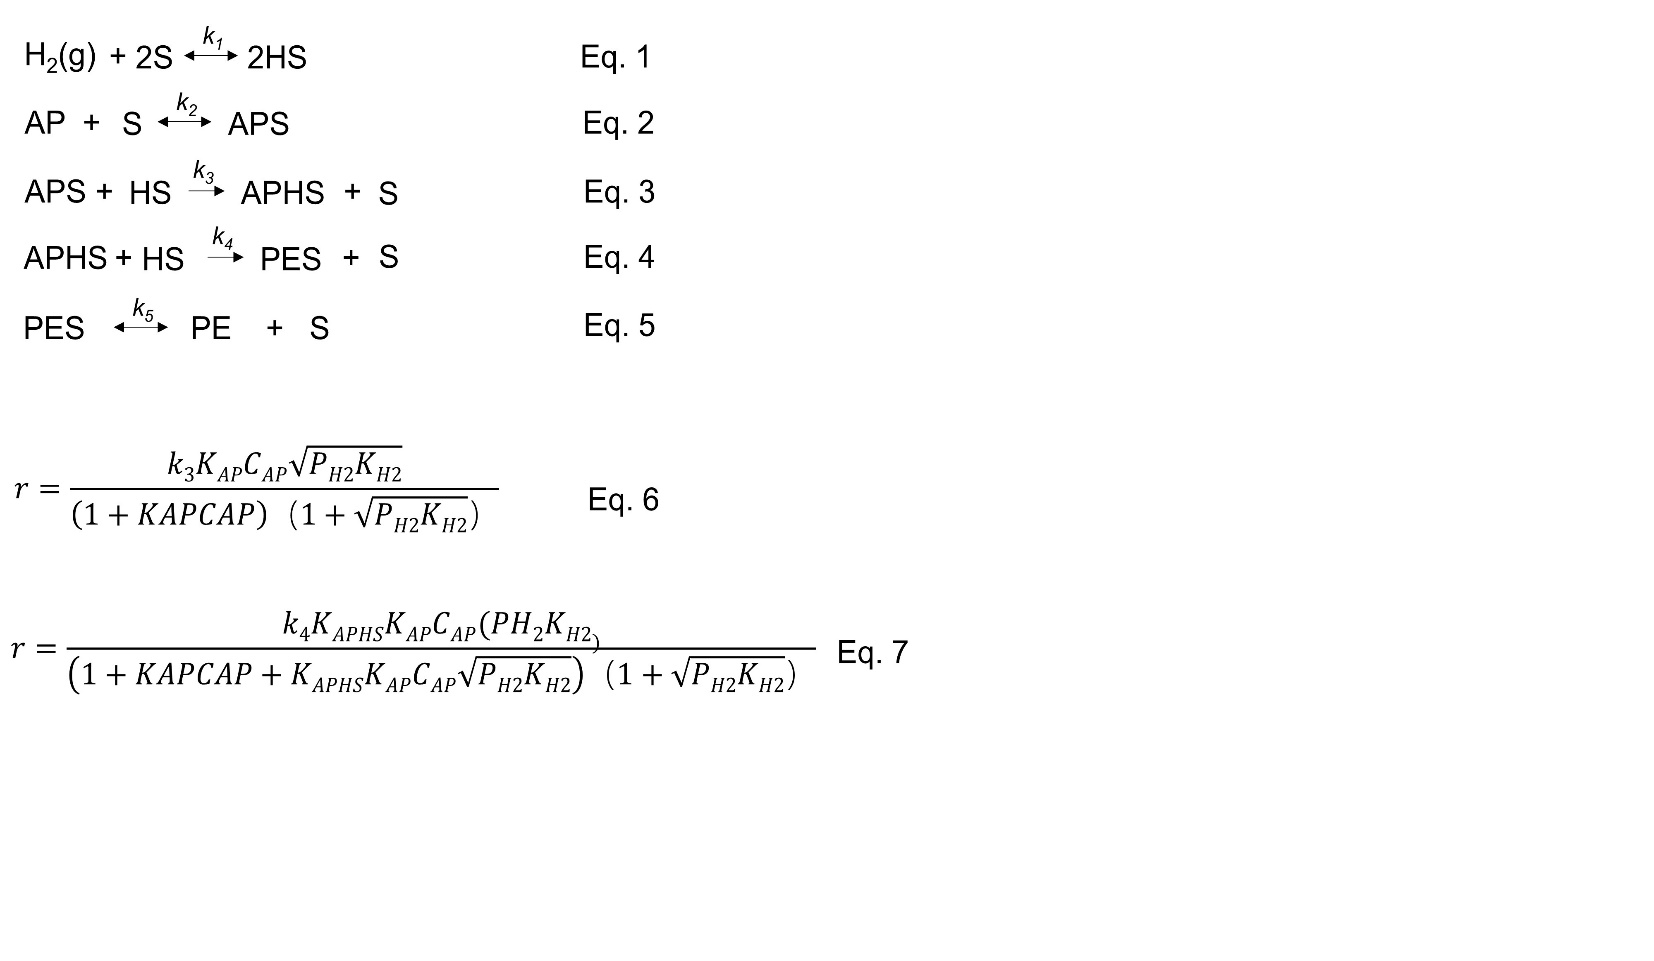


When the second hydrogenation of AP is the RDS:


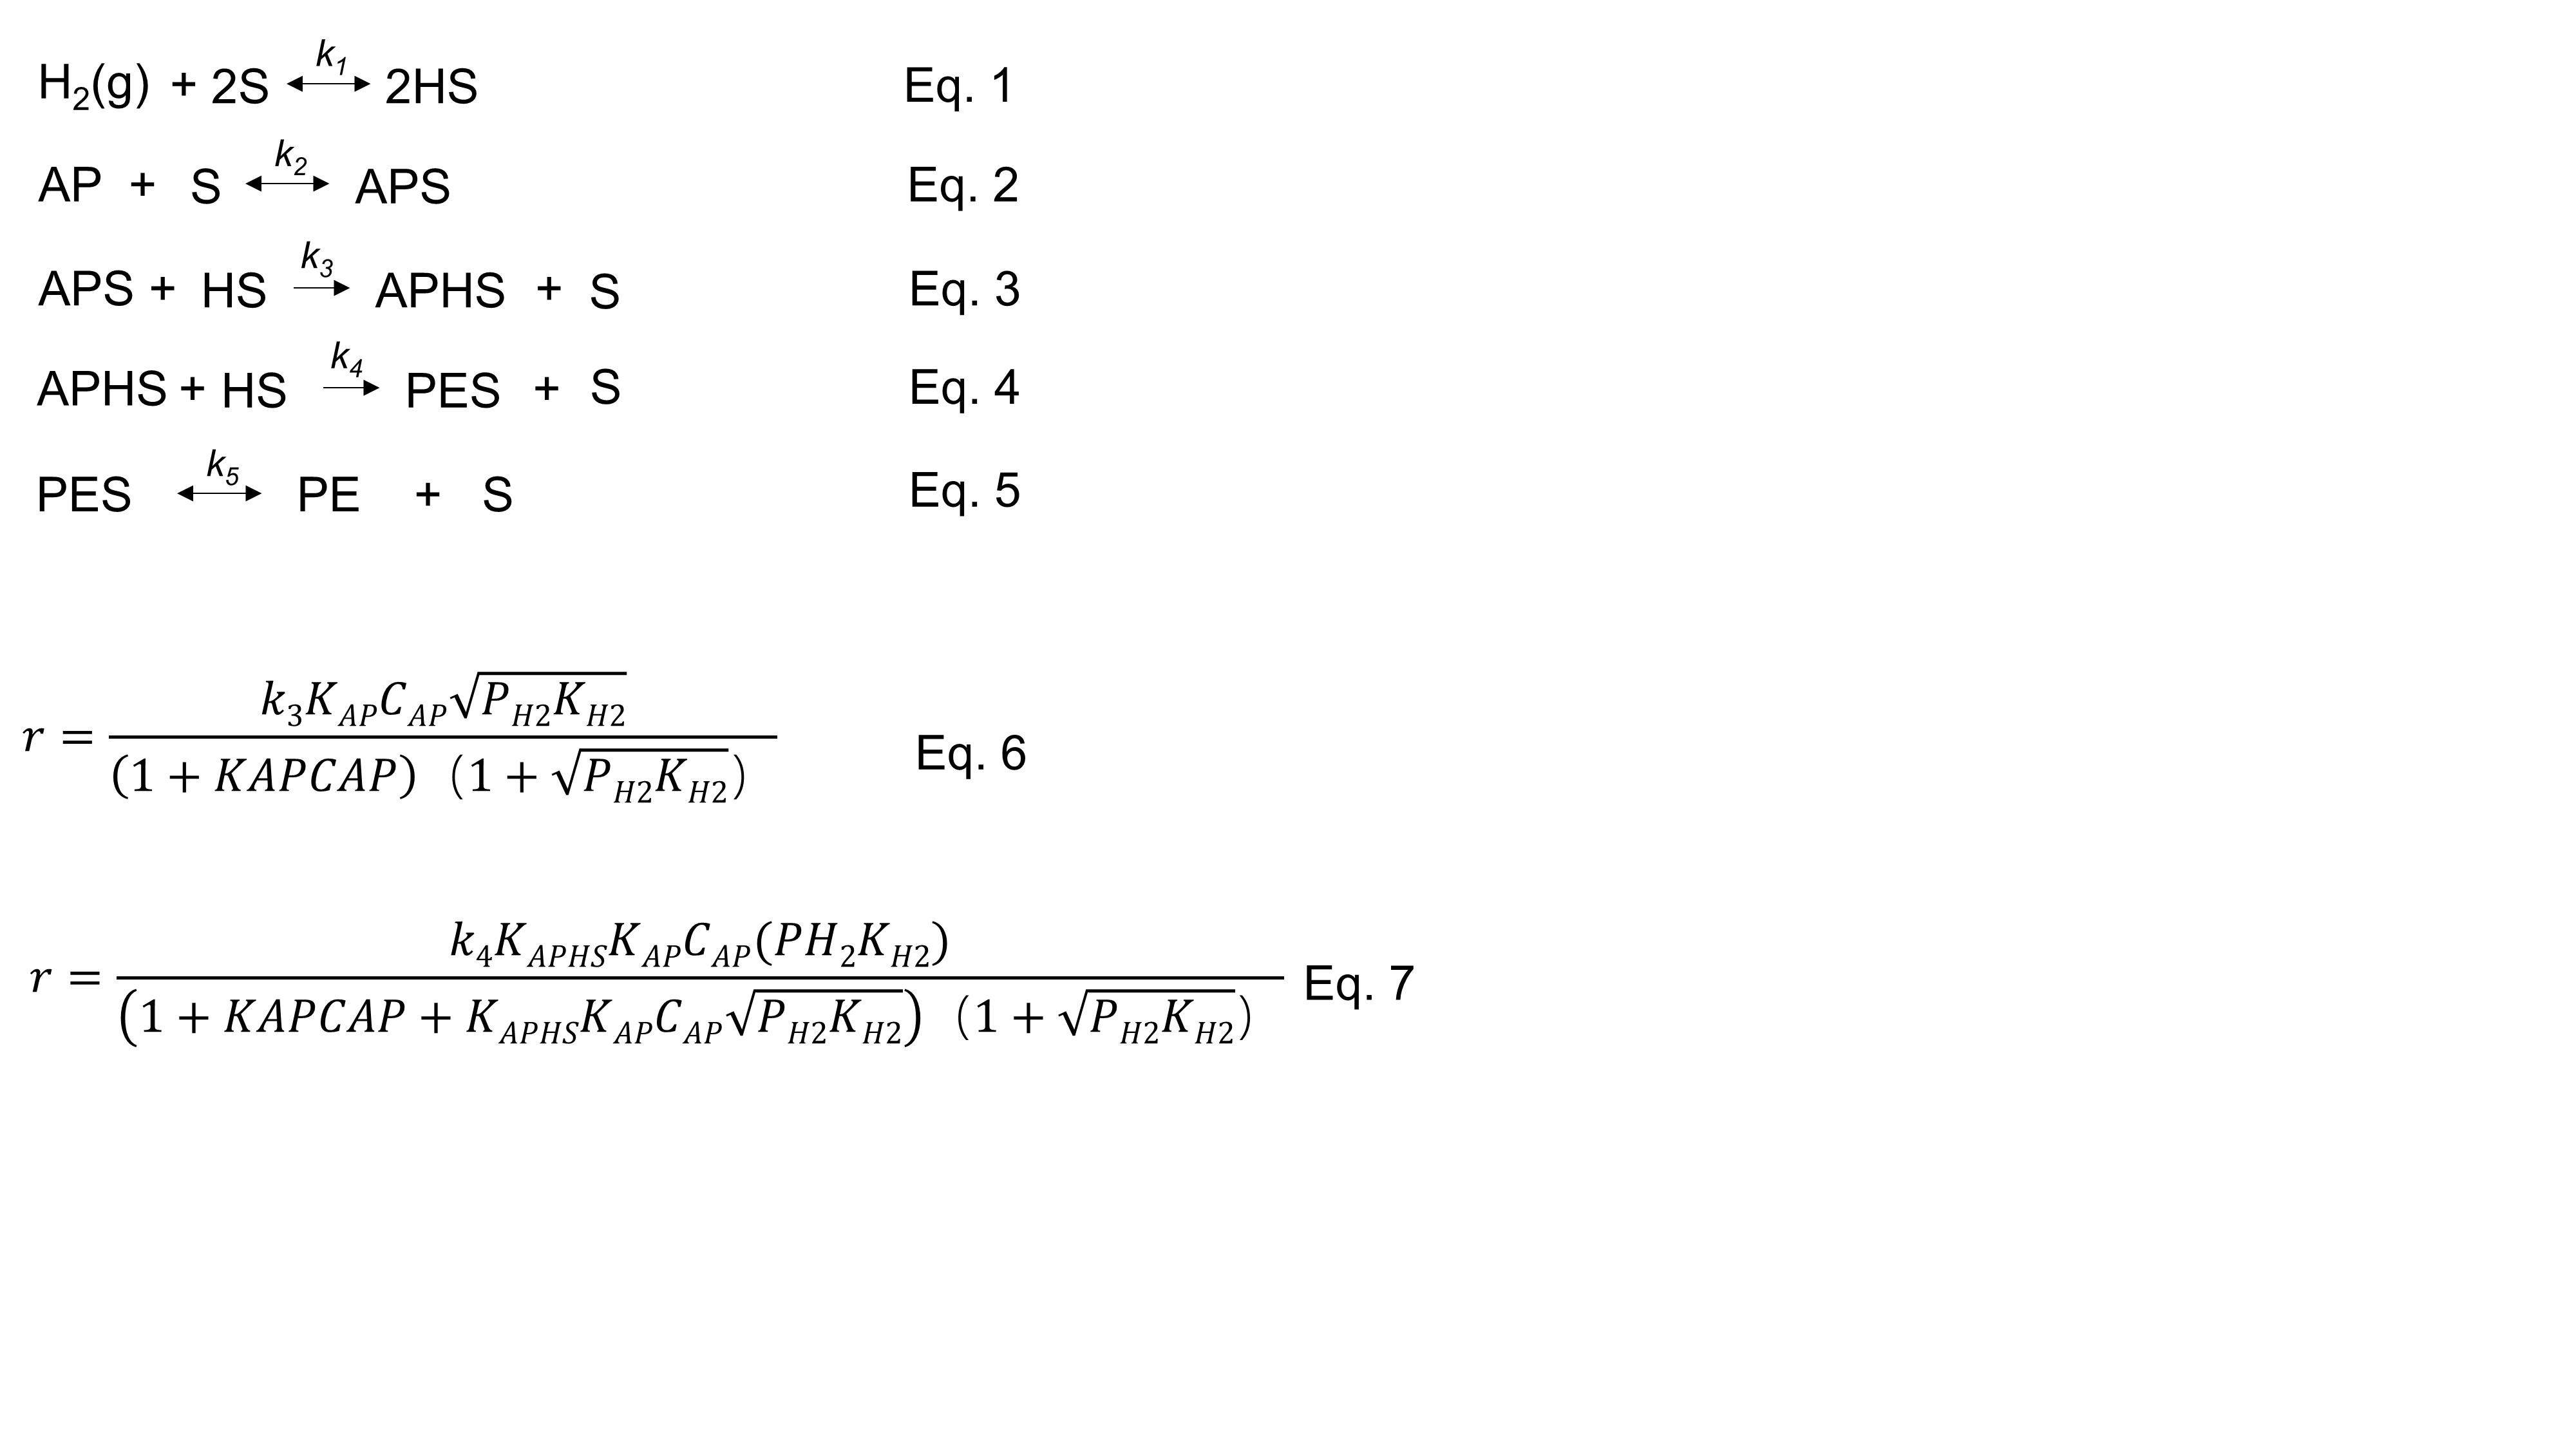


Where *Ki* is adsorption constant.

When the reactions are carried out under low H2 pressure, the 1+ term in the denominator is approximate to 1. Therefore, the reaction order based on H2 at low H2 pressure is half order for Eq. 6 and first order for Eq. 7, respectively.

1. **Computational methods**

We have employed the Vienna Ab Initio Package (VASP)[1,2] to perform all the density functional theory (DFT) calculations within the generalized gradient approximation (GGA) using the PBE[3] formulation. We have chosen the projected augmented wave (PAW) potentials[4,5] to describe the ionic cores and take valence electrons into account using a plane wave basis set with a kinetic energy cutoff of 400 eV. Partial occupancies of the Kohn−Sham orbitals were allowed using the Gaussian smearing method and a width of 0.05 eV. The electronic energy was considered self-consistent when the energy change was smaller than 10−5 eV. A geometry optimization was considered convergent when the force change was smaller than 0.02 eV/Å. Grimme’s DFT-D3 methodology[6] was used to describe the dispersion interactions.

The equilibrium lattice constants of hexagonal JDL P-6 unit cell were optimized, when using a 1×1×7 Monkhorst-Pack k-point grid for Brillouin zone sampling, to be a=37.617 Å, c=3.740 Å. We then use it to construct a (001) monolayer model with *p*(1×1) periodicity in the x and y directions and 1 stoichiometric layer in the z direction separated by a vacuum layer in the depth of 20 Å in order to separate the surface slab from its periodic duplicates. During structural optimizations, the gamma point in the Brillouin zone was used for k-point sampling, and all atoms were allowed to relax.

The equilibrium lattice constants of monoclinic CM COF unit cell were optimized, when using a 1×1×7 Monkhorst-Pack k-point grid for Brillouin zone sampling, to be a=35.503 Å, b=33.392 Å, c=4.034 Å, α=90°, β=75.6°, γ=90°. We then use it to construct a (001) monolayer model with *p*(1×1) periodicity in the x and y directions and 1 stoichiometric layer in the z direction separated by a vacuum layer in the depth of 20 Å in order to separate the surface slab from its periodic duplicates. During structural optimizations, the gamma point in the Brillouin zone was used for k-point sampling, and all atoms were allowed to relax.

The adsorption energy (Eads) of adsorbate A was defined as

Eads = EA/surf – Esurf - EA(g)

where EA/surf, Esurf and EA(g) are the energy of adsorbate A adsorbed on the surface, the energy of clean surface, and the energy of isolated A molecule in a cubic periodic box with a side length of 20 Å and a 1×1×1 Monkhorst-Pack k-point grid for Brillouin zone sampling, respectively.

Finally, transition states for elementary reaction steps were determined by a combination of the nudged elastic band (NEB) method[7] and the dimer method[8-10]. In the NEB method, the path between the reactant and product is discretized into a series of structural images. The image that is closest to a likely transition state structure was then employed as an initial guess structure for the dimer method.

The interaction energies between Py-COF/Be-COF and AP/CHO were carried out by using Gaussian 09 program suite.[11] All structures were optimized at the PBE0 level with Grimme’s dispersion correction at the D3 level (PBE0-D3) by employing the def2-SVP basis set for all atoms (C, H, O, N). The interaction energies were calculated at the M06-2X/def2-SVP level by including basis set superposition errors at the PBE0-D3/def2-SVP optimized structures.

1. **Additional catalytic results and characterization information**

**Table S1**. Physical parameters and Pd 3d binding energies of Pd/COFs and commercial Pd/C.

| Cat. | BET surface area (m2 g-1) | Pd dispersion (%)a | Pd 3d5/2 (eV)b | Pd0/Pd2+ (%)b | L/B ratioc |
| --- | --- | --- | --- | --- | --- |
| Pd/Py-COF | 567 | 26.2 | 335.3 | 68/32 | 0.14 |
| Pd/Be-COF | 1139 | 26.1 | 335.3 | 68/32 | 0.15 |
| Pd/TB-COF | 396 | 24.2 | 335.3 | 67/33 | 0.15 |
| Pd/C | 959 | 17.8 | 335.4 | 58/42 | -- |

aData obtained from CO chemisorption results. bData obtained from XPS results. cCalculated based on in situ FT-IR of CO adsorption.

**Table S2**. The AP hydrogenation with Pd/COFs and commercial Pd/C.

| Cat. | Conv. (%) | Sel. (%) | | |
| --- | --- | --- | --- | --- |
| phenyl ethanol | ethylbenzene | ethylcyclohexane |
| Pd/Py-COF | >99 | >99 | 0 | 0 |
| Pd/Be-COF | 30 | >99 | 0 | 0 |
| Pd/TB-COF | 22 | >99 | 0 | 0 |
| Pd/C | >99 | 0 | 99 | 1 |

Reaction conditions: 40 oC, 10 bar of H2, 2 mL of EtOH, 0.3 mmol of substrates, Pd catalysts 0.25 mol%, 3h.

**Table S3**. The catalytic results of H2-D2 exchange reaction over Pd NPs.

| Cat. | Conv. (%) | TOF (h-1) | Normalized Activity |
| --- | --- | --- | --- |
| Pd/Py-COF | 14.1 | 6.5*106 | 57 |
| Pd/Be-COF | 8.0 | 3.7*106 | 55 |
| Pd/C | 7.7 | 3.6*106 | 100 |

The reaction conditions see experimental section.

**Table S4.** Synthesis of Py-COF under different conditions.a

| Sample | Solvent (V: V: V) | State |
| --- | --- | --- |
| 1 | O-dichlorobenzene: n-butanol: CH3COOH = 10: 5: 1 | Crystalline solid |
| 2 | O-dichlorobenzene: mesitylene: CH3COOH: 5: 5: 1 | Amorphous solid |
| 3 | THF: mesitylene: CH3COOH: 5: 5: 1 | Amorphous solid |
| 4 | 1,4-dioxane: mesitylene: CH3COOH: 5: 5: 1 | Amorphous solid |
| 5b | O-dichlorobenzene: n-butanol: CH3COOH = 10: 5: 1 | Crystalline solid |

aConditions: Py (57 mg), DMTA (40 mg), solvent (3.2 mL), 6 M CH3COOH (0.2 mL), N2 atmosphere, 85 oC, 3 d. bPy (285 mg), DMTA (200 mg), solvent (16 mL), 5 d.

**Table S5.** Pd/Py-COF catalysed AP hydrogenation with different solvent.a

| Solvent | Conv. (%) | Sel. (%) |
| --- | --- | --- |
| EtOH | 92 | 99 |
| Isopropyl alcohol | 69 | 99 |
| H2O | 87 | 99 |
| CH2Cl2 | 50 | 99 |
| Ethyl acetate | 29 | 99 |
| n-hexane | 49 | 99 |
| 1,4-Dioxane | 20 | 99 |

aReactionConditions: 40 oC, 10 bar of H2, 2 mL of solvent, 0.3 mmol of AP, Pd catalysts 0.833mol%, 2h.


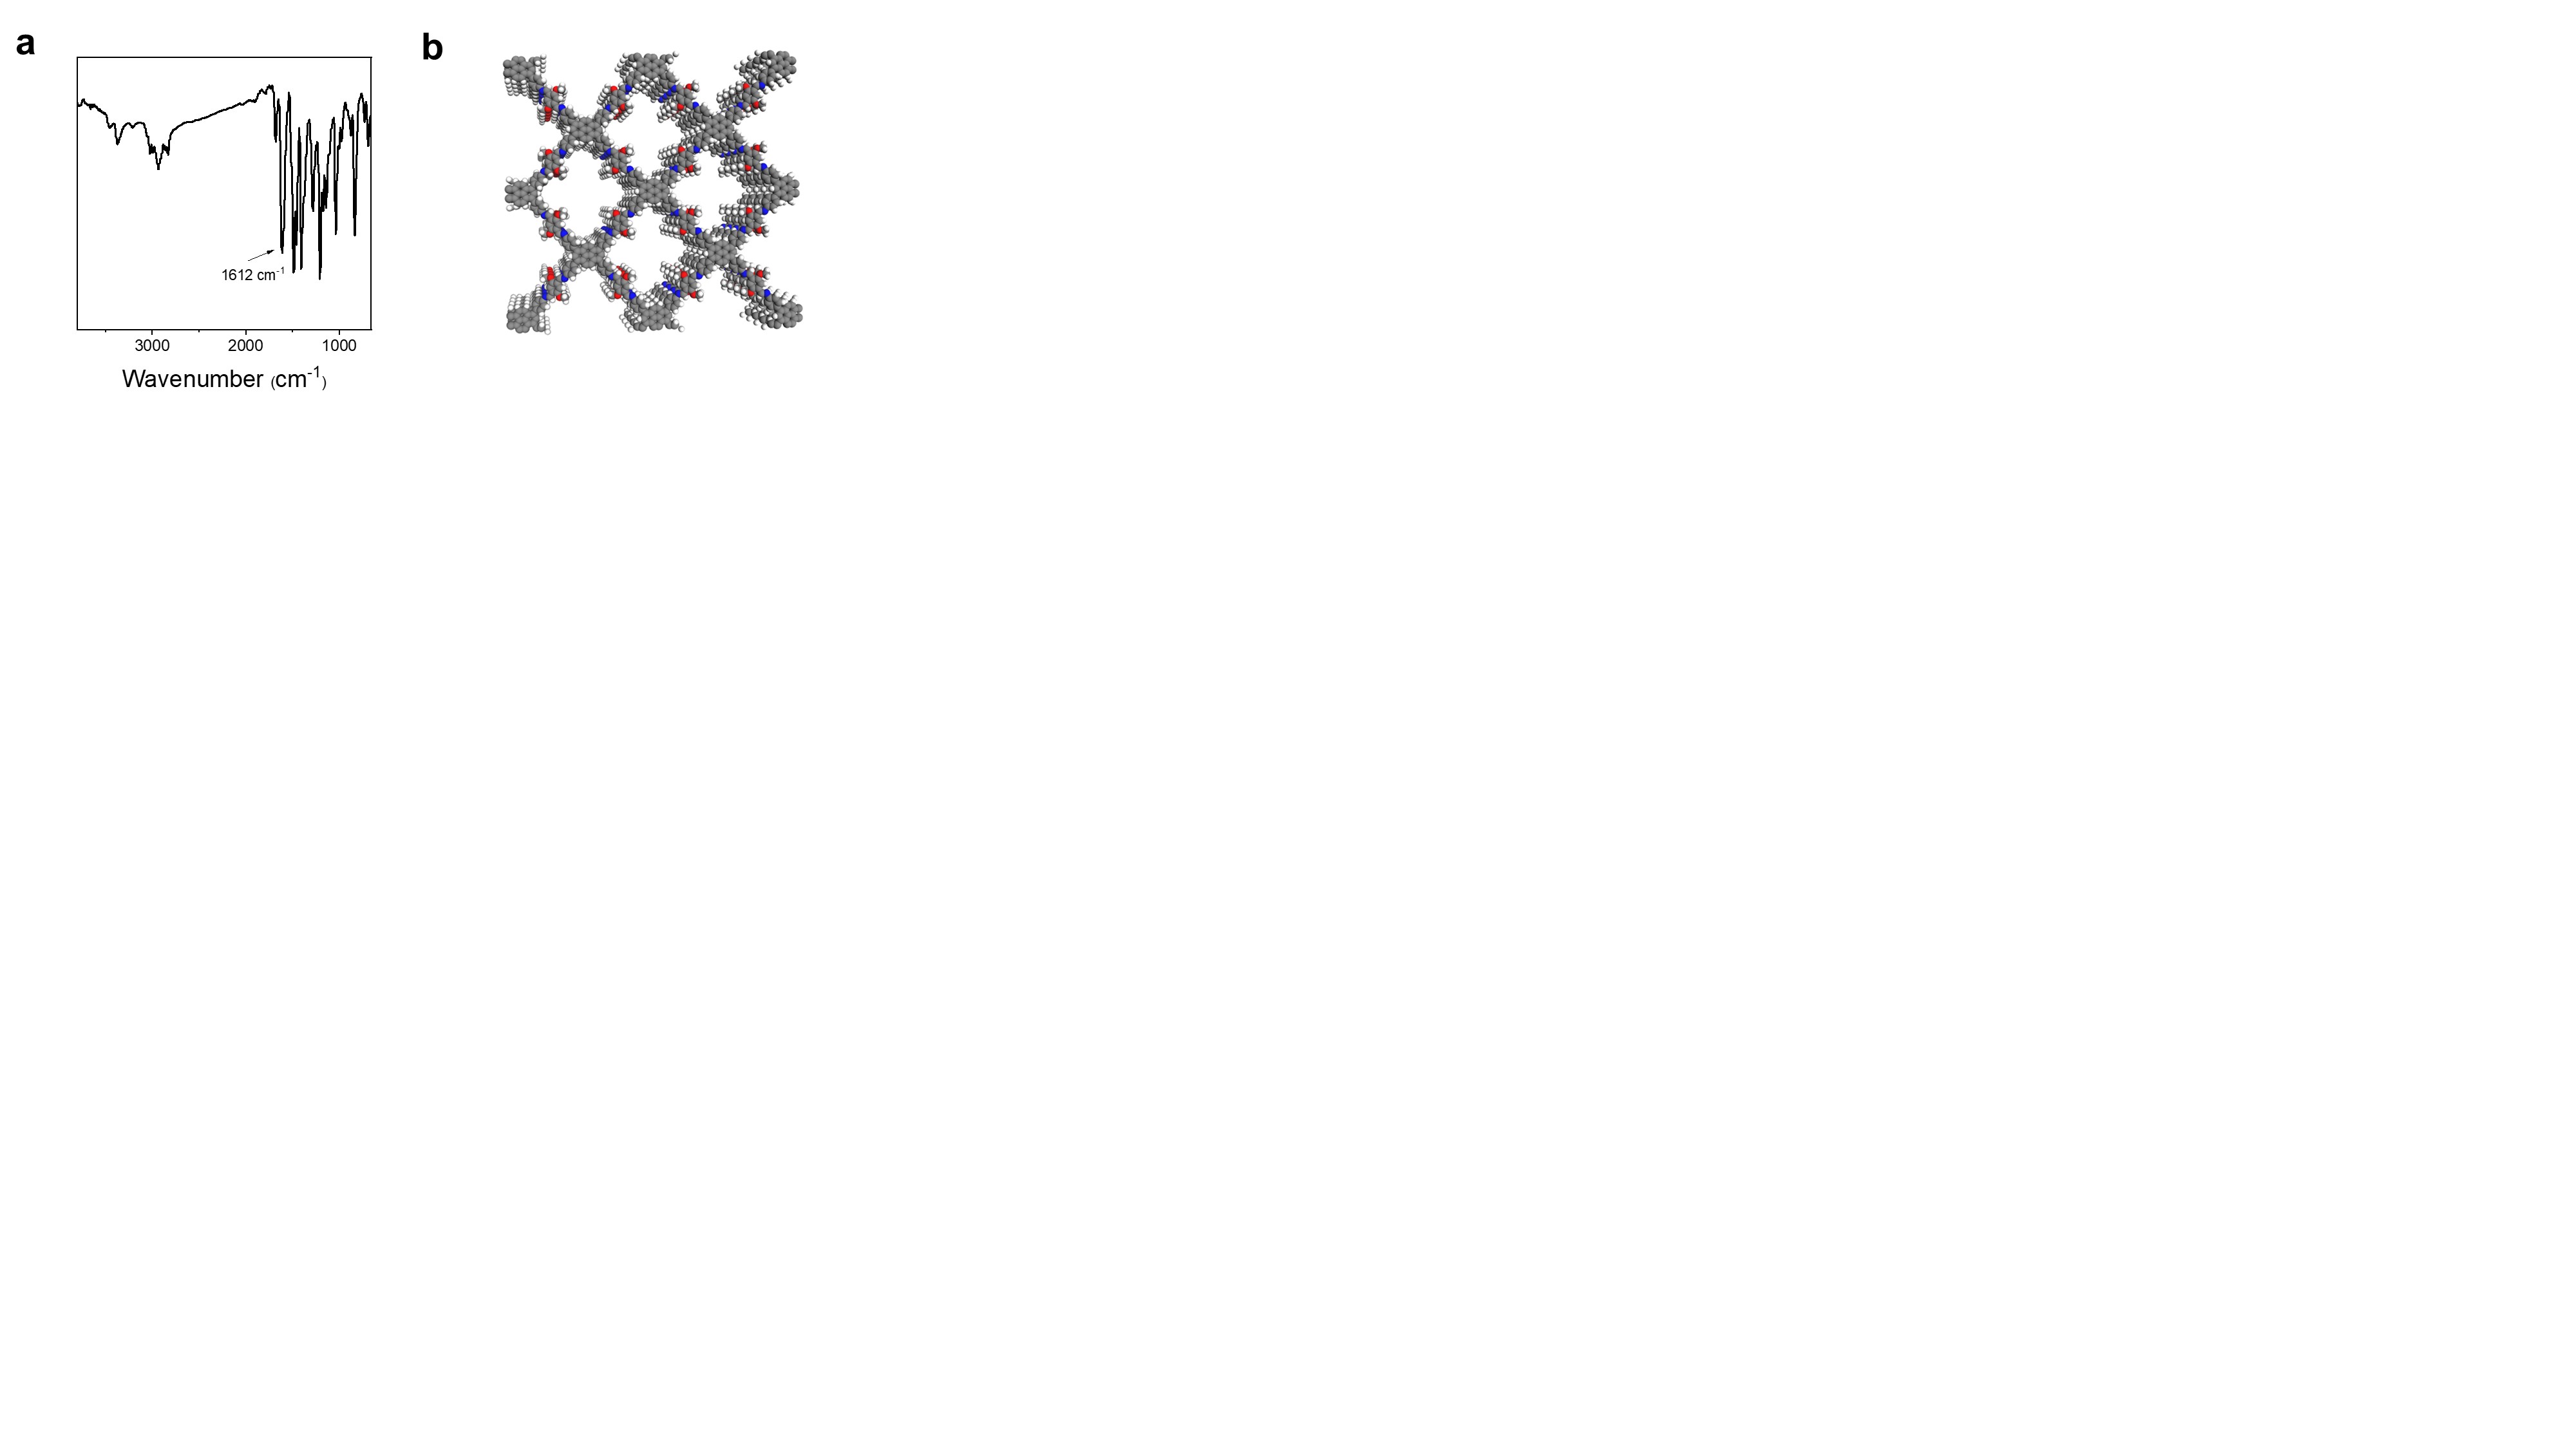


**Figure S1**. **a** FTIR spectrum and **b** top view of Py-COF.


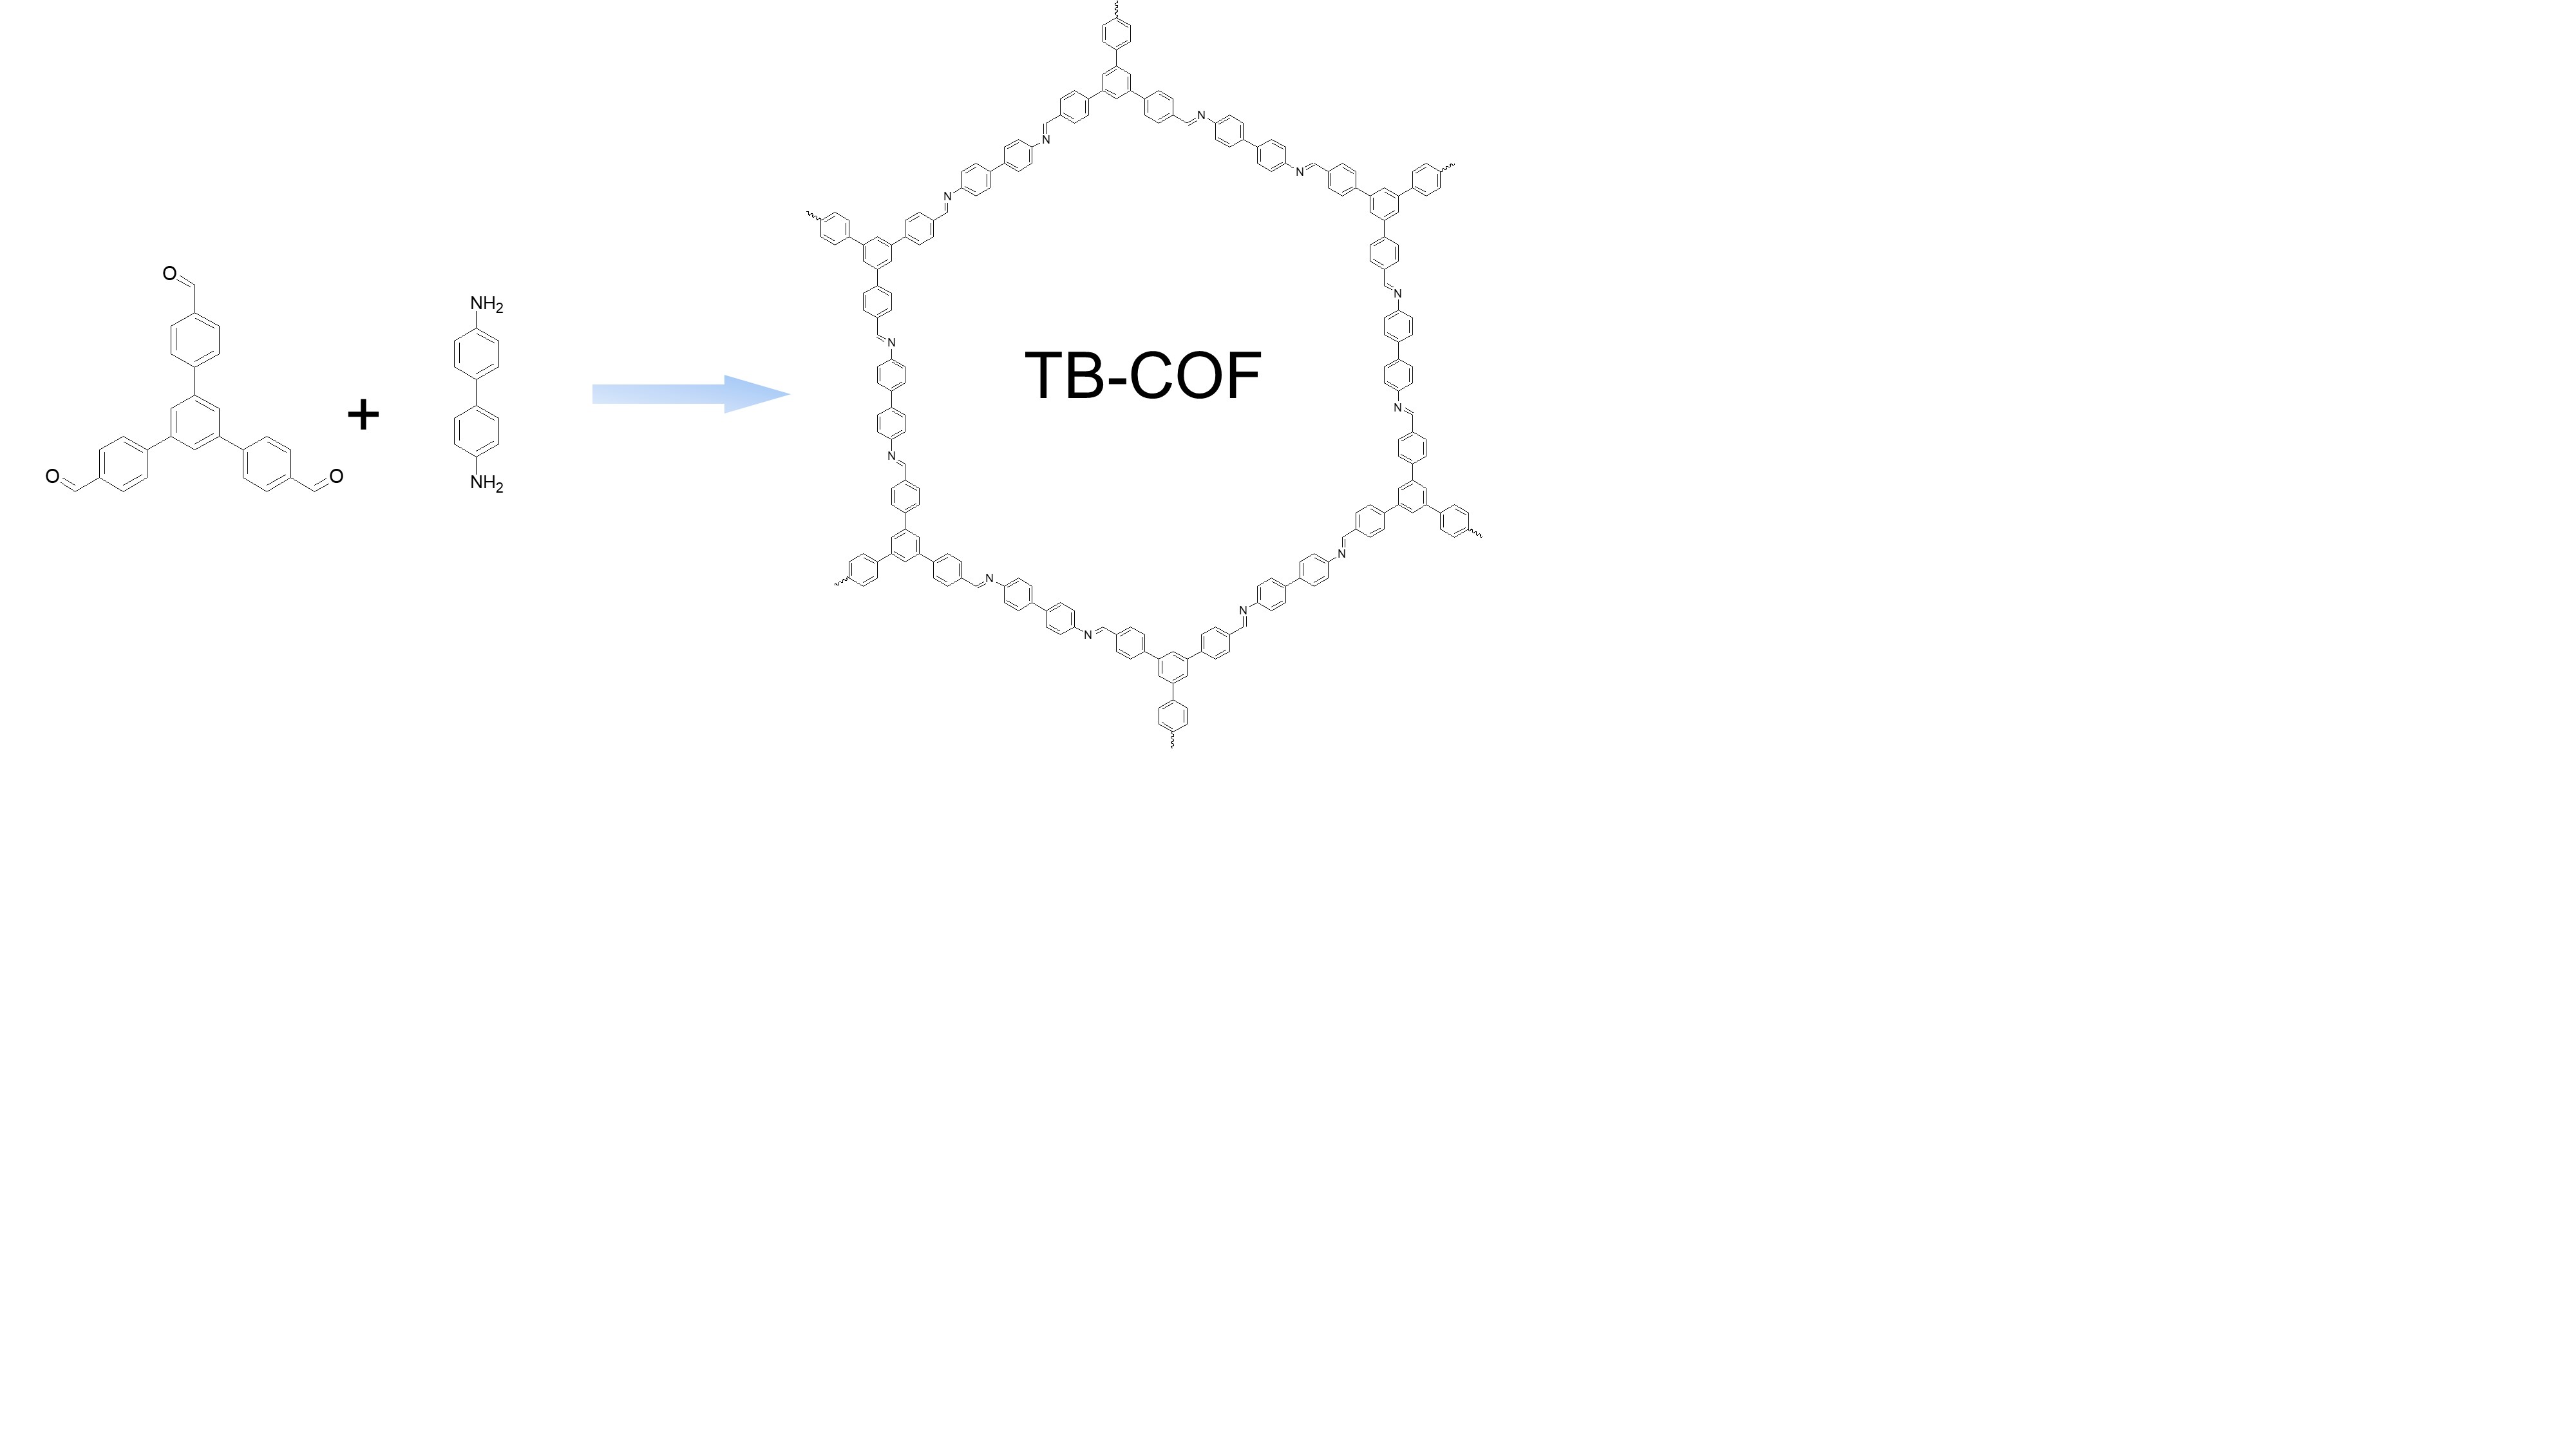


**Figure S2**. Synthesis of TB-COF


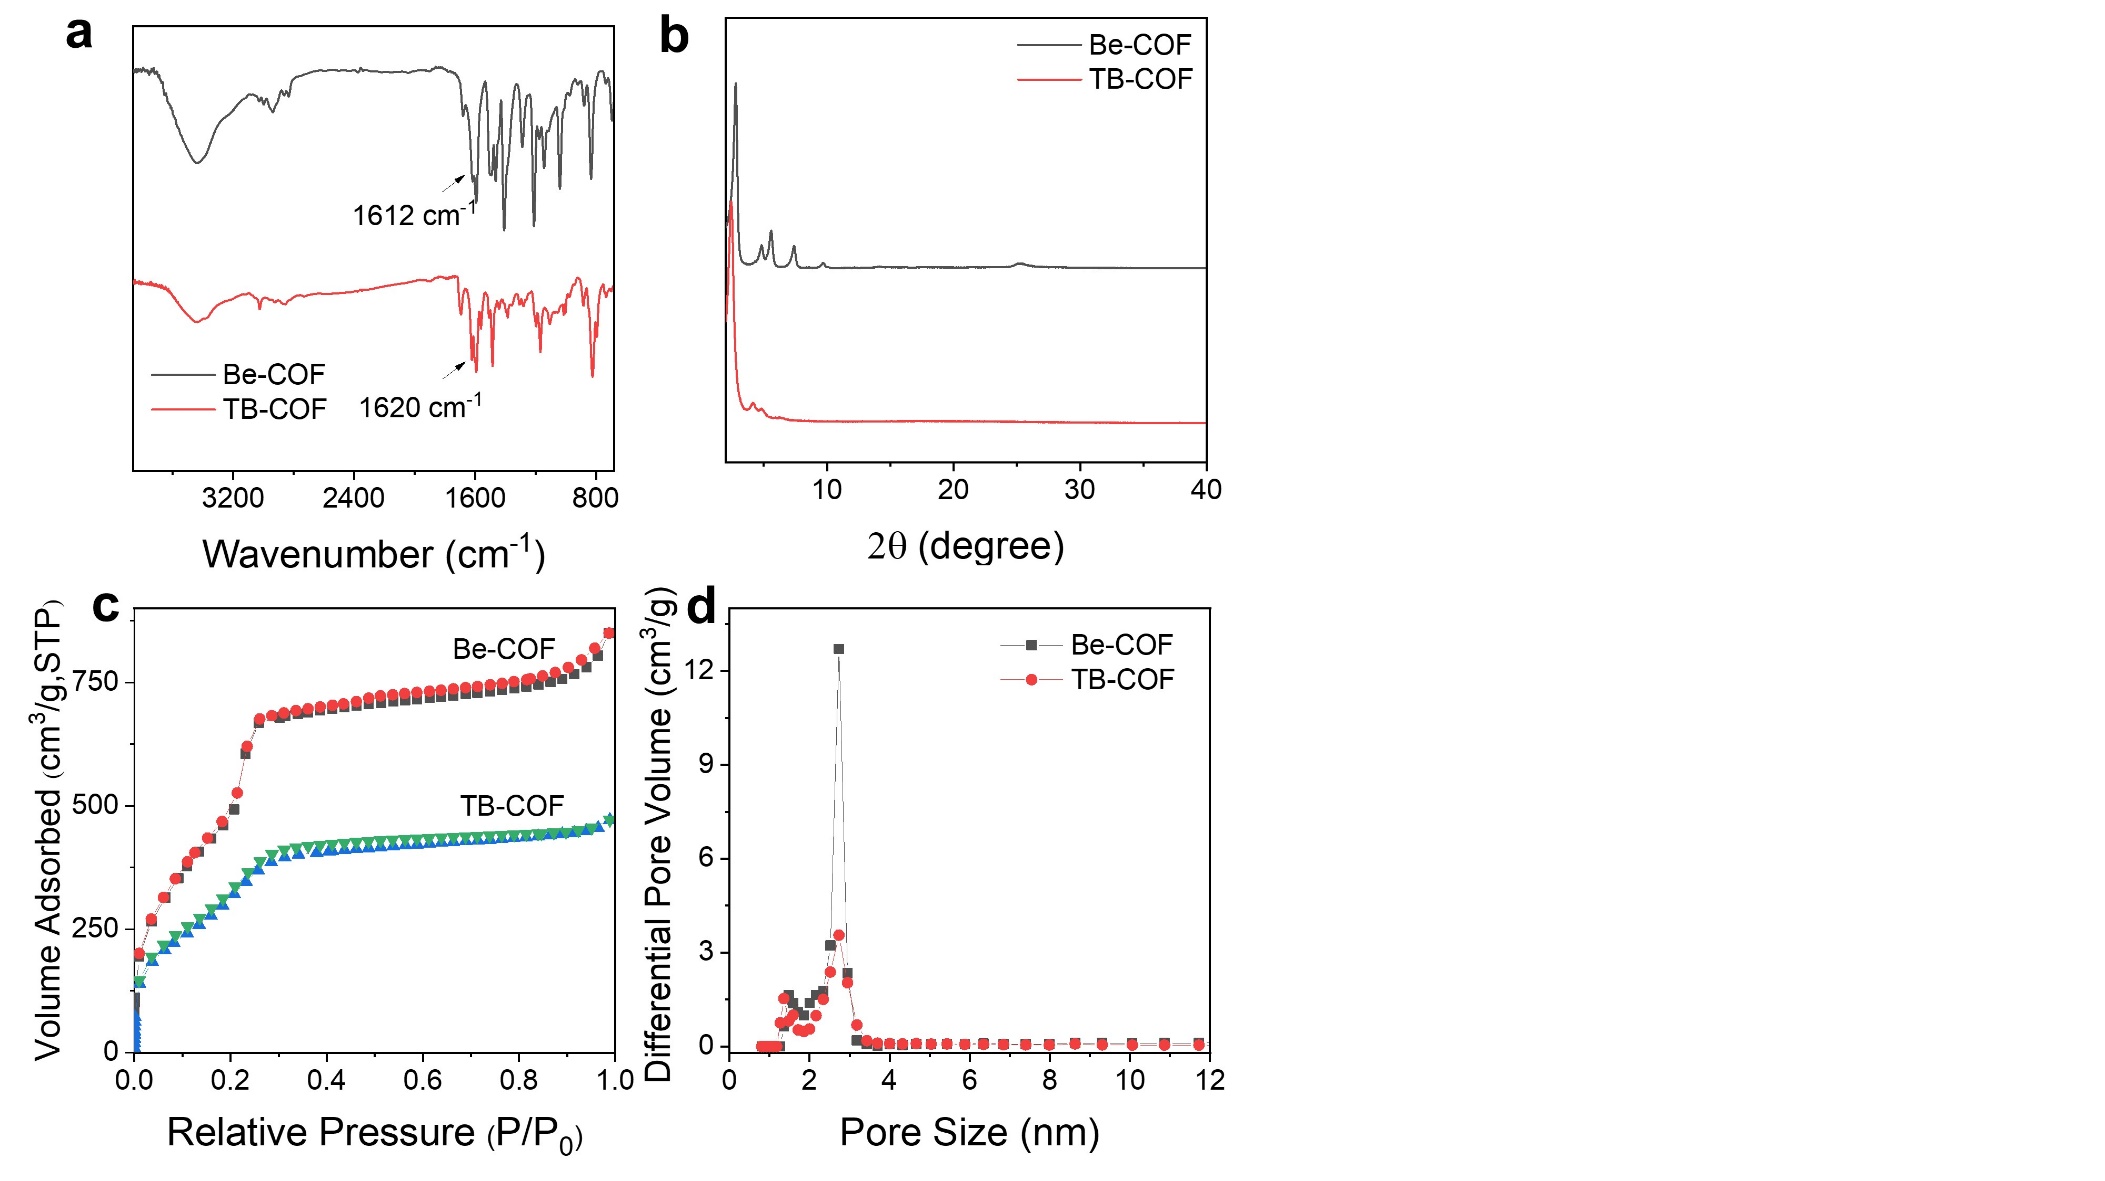


**Figure S3.** **a** FT-IR spectra, **b** PXRD patterns, **c** N2 adsorption isotherms and **d** pore size distribution of Be-COF and TB-COF.


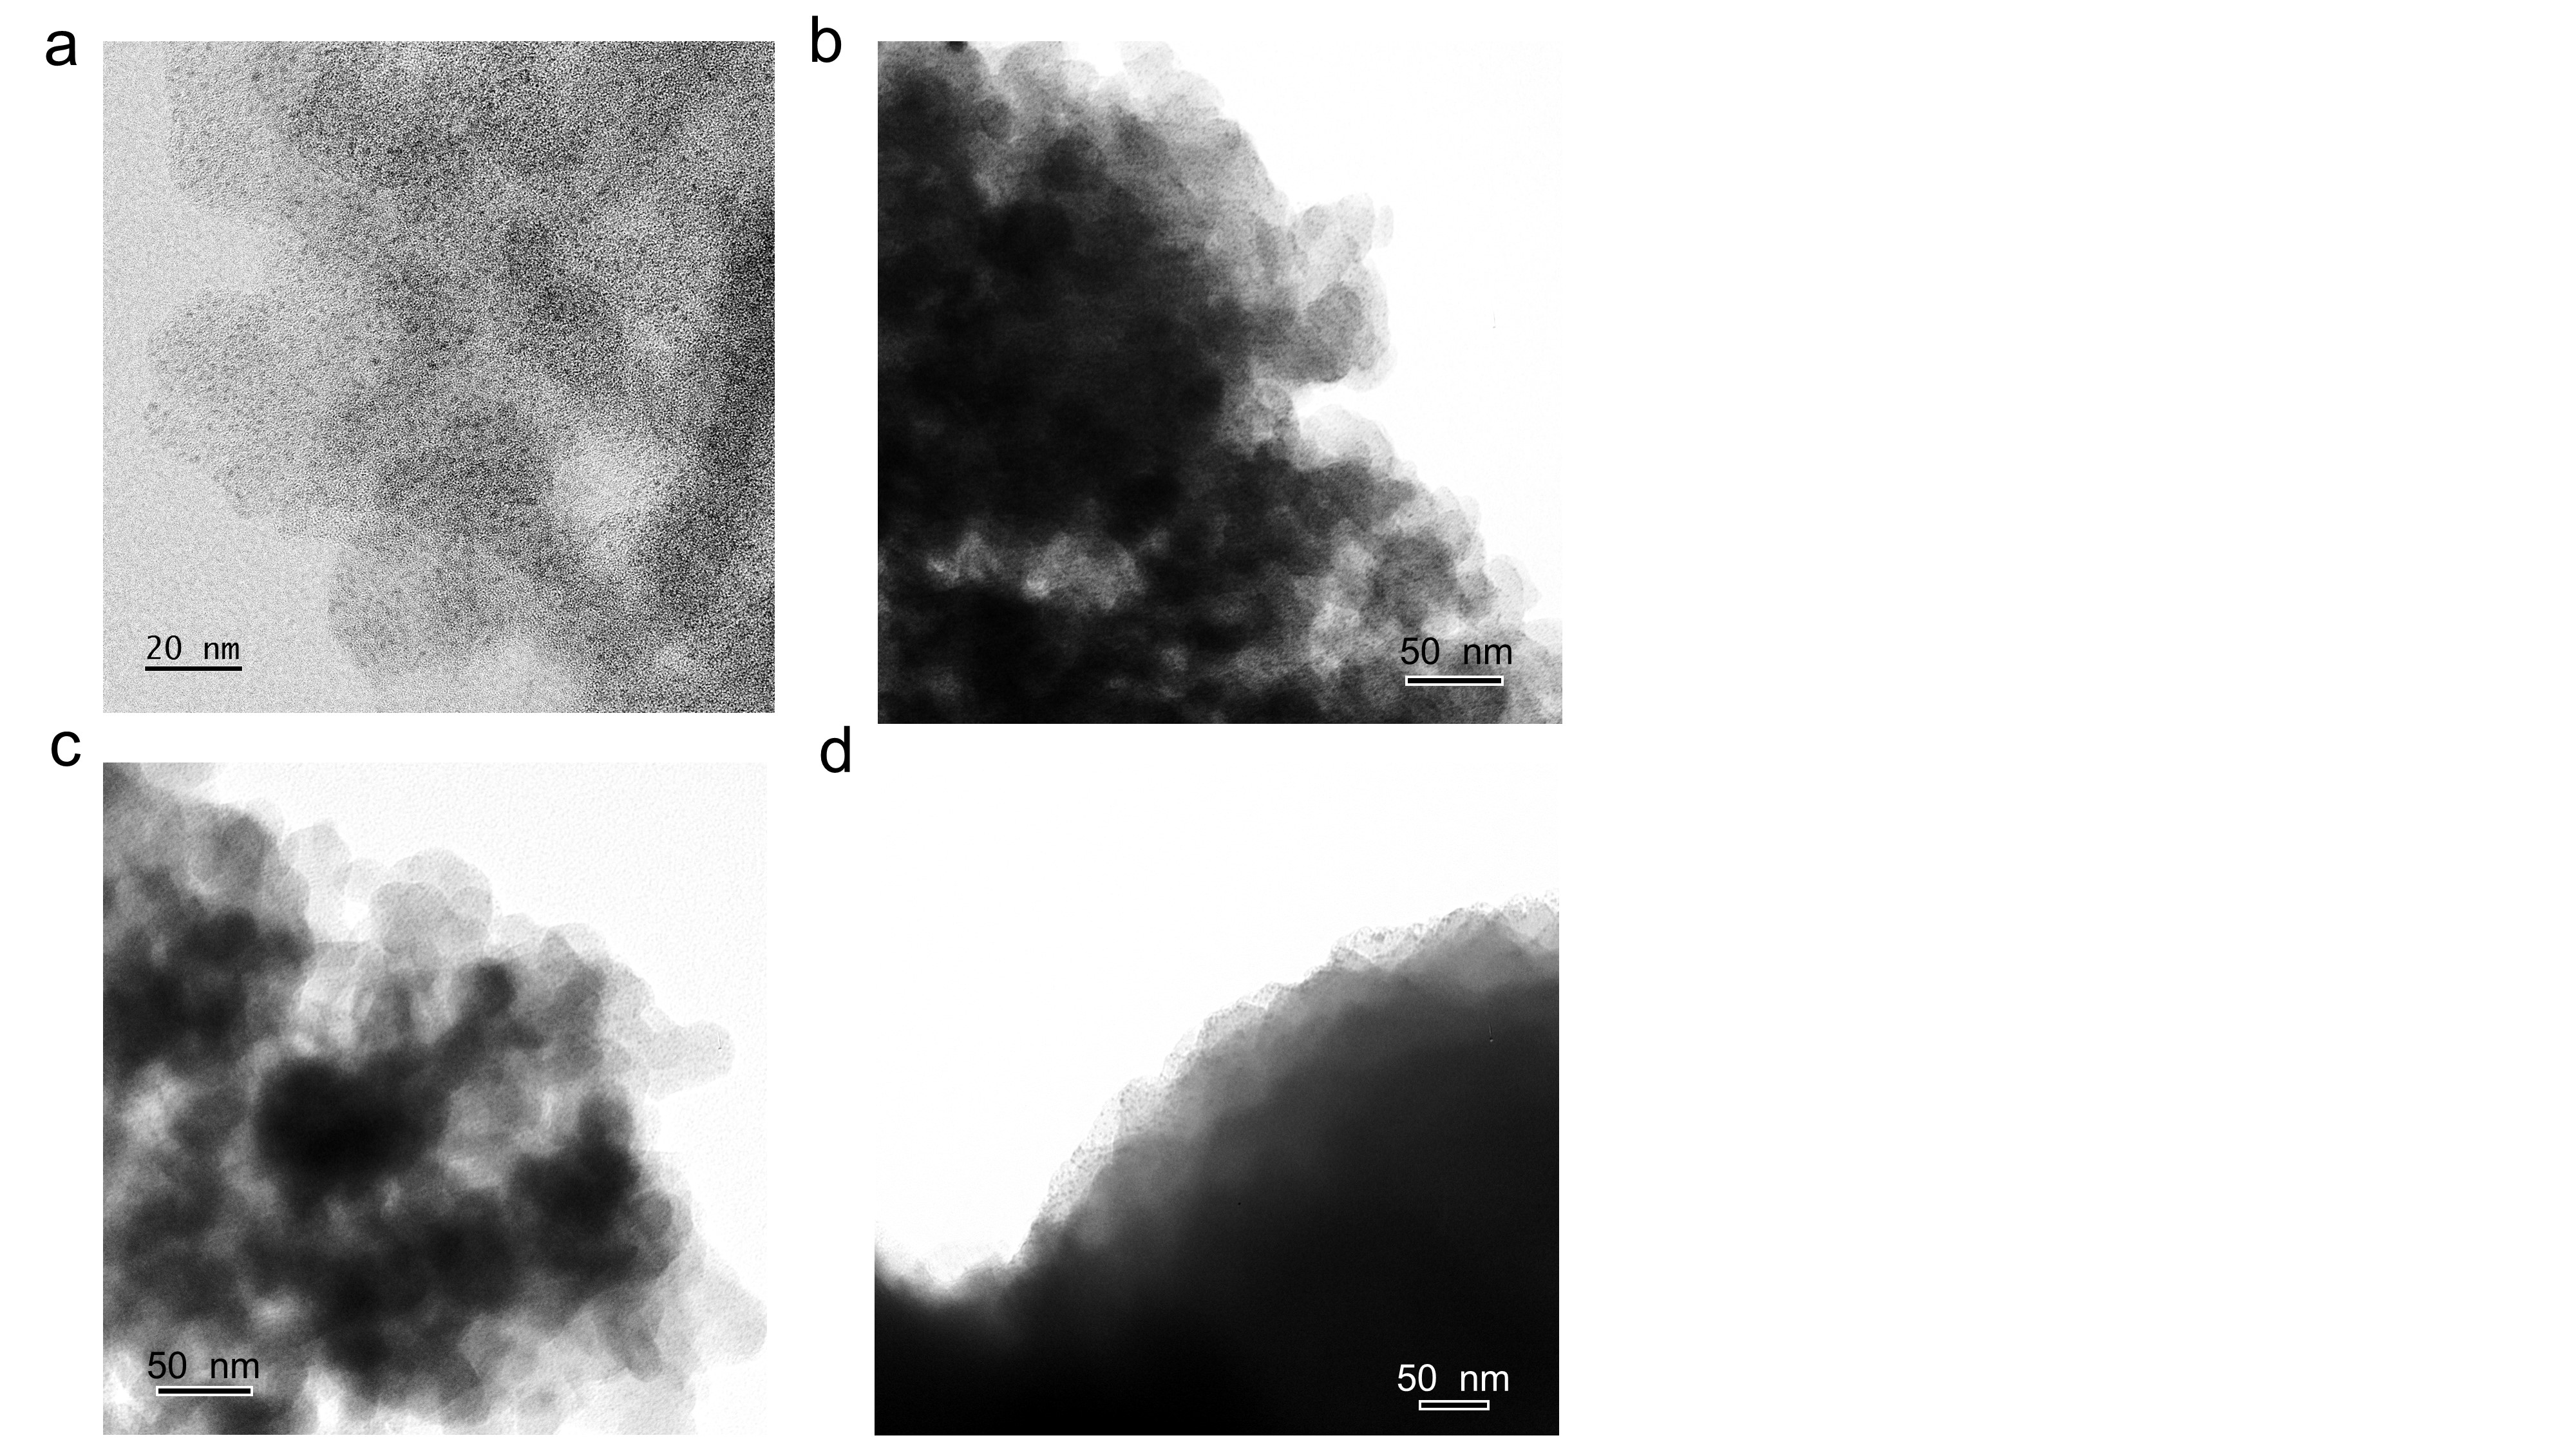


**Figure S4. a** HRTEM image of Pd/Py-COF, and TEM images of **b** Pd/Py-COF (10 wt%), **c** Pd/Be-COF and **d** Pd/TB-COF.


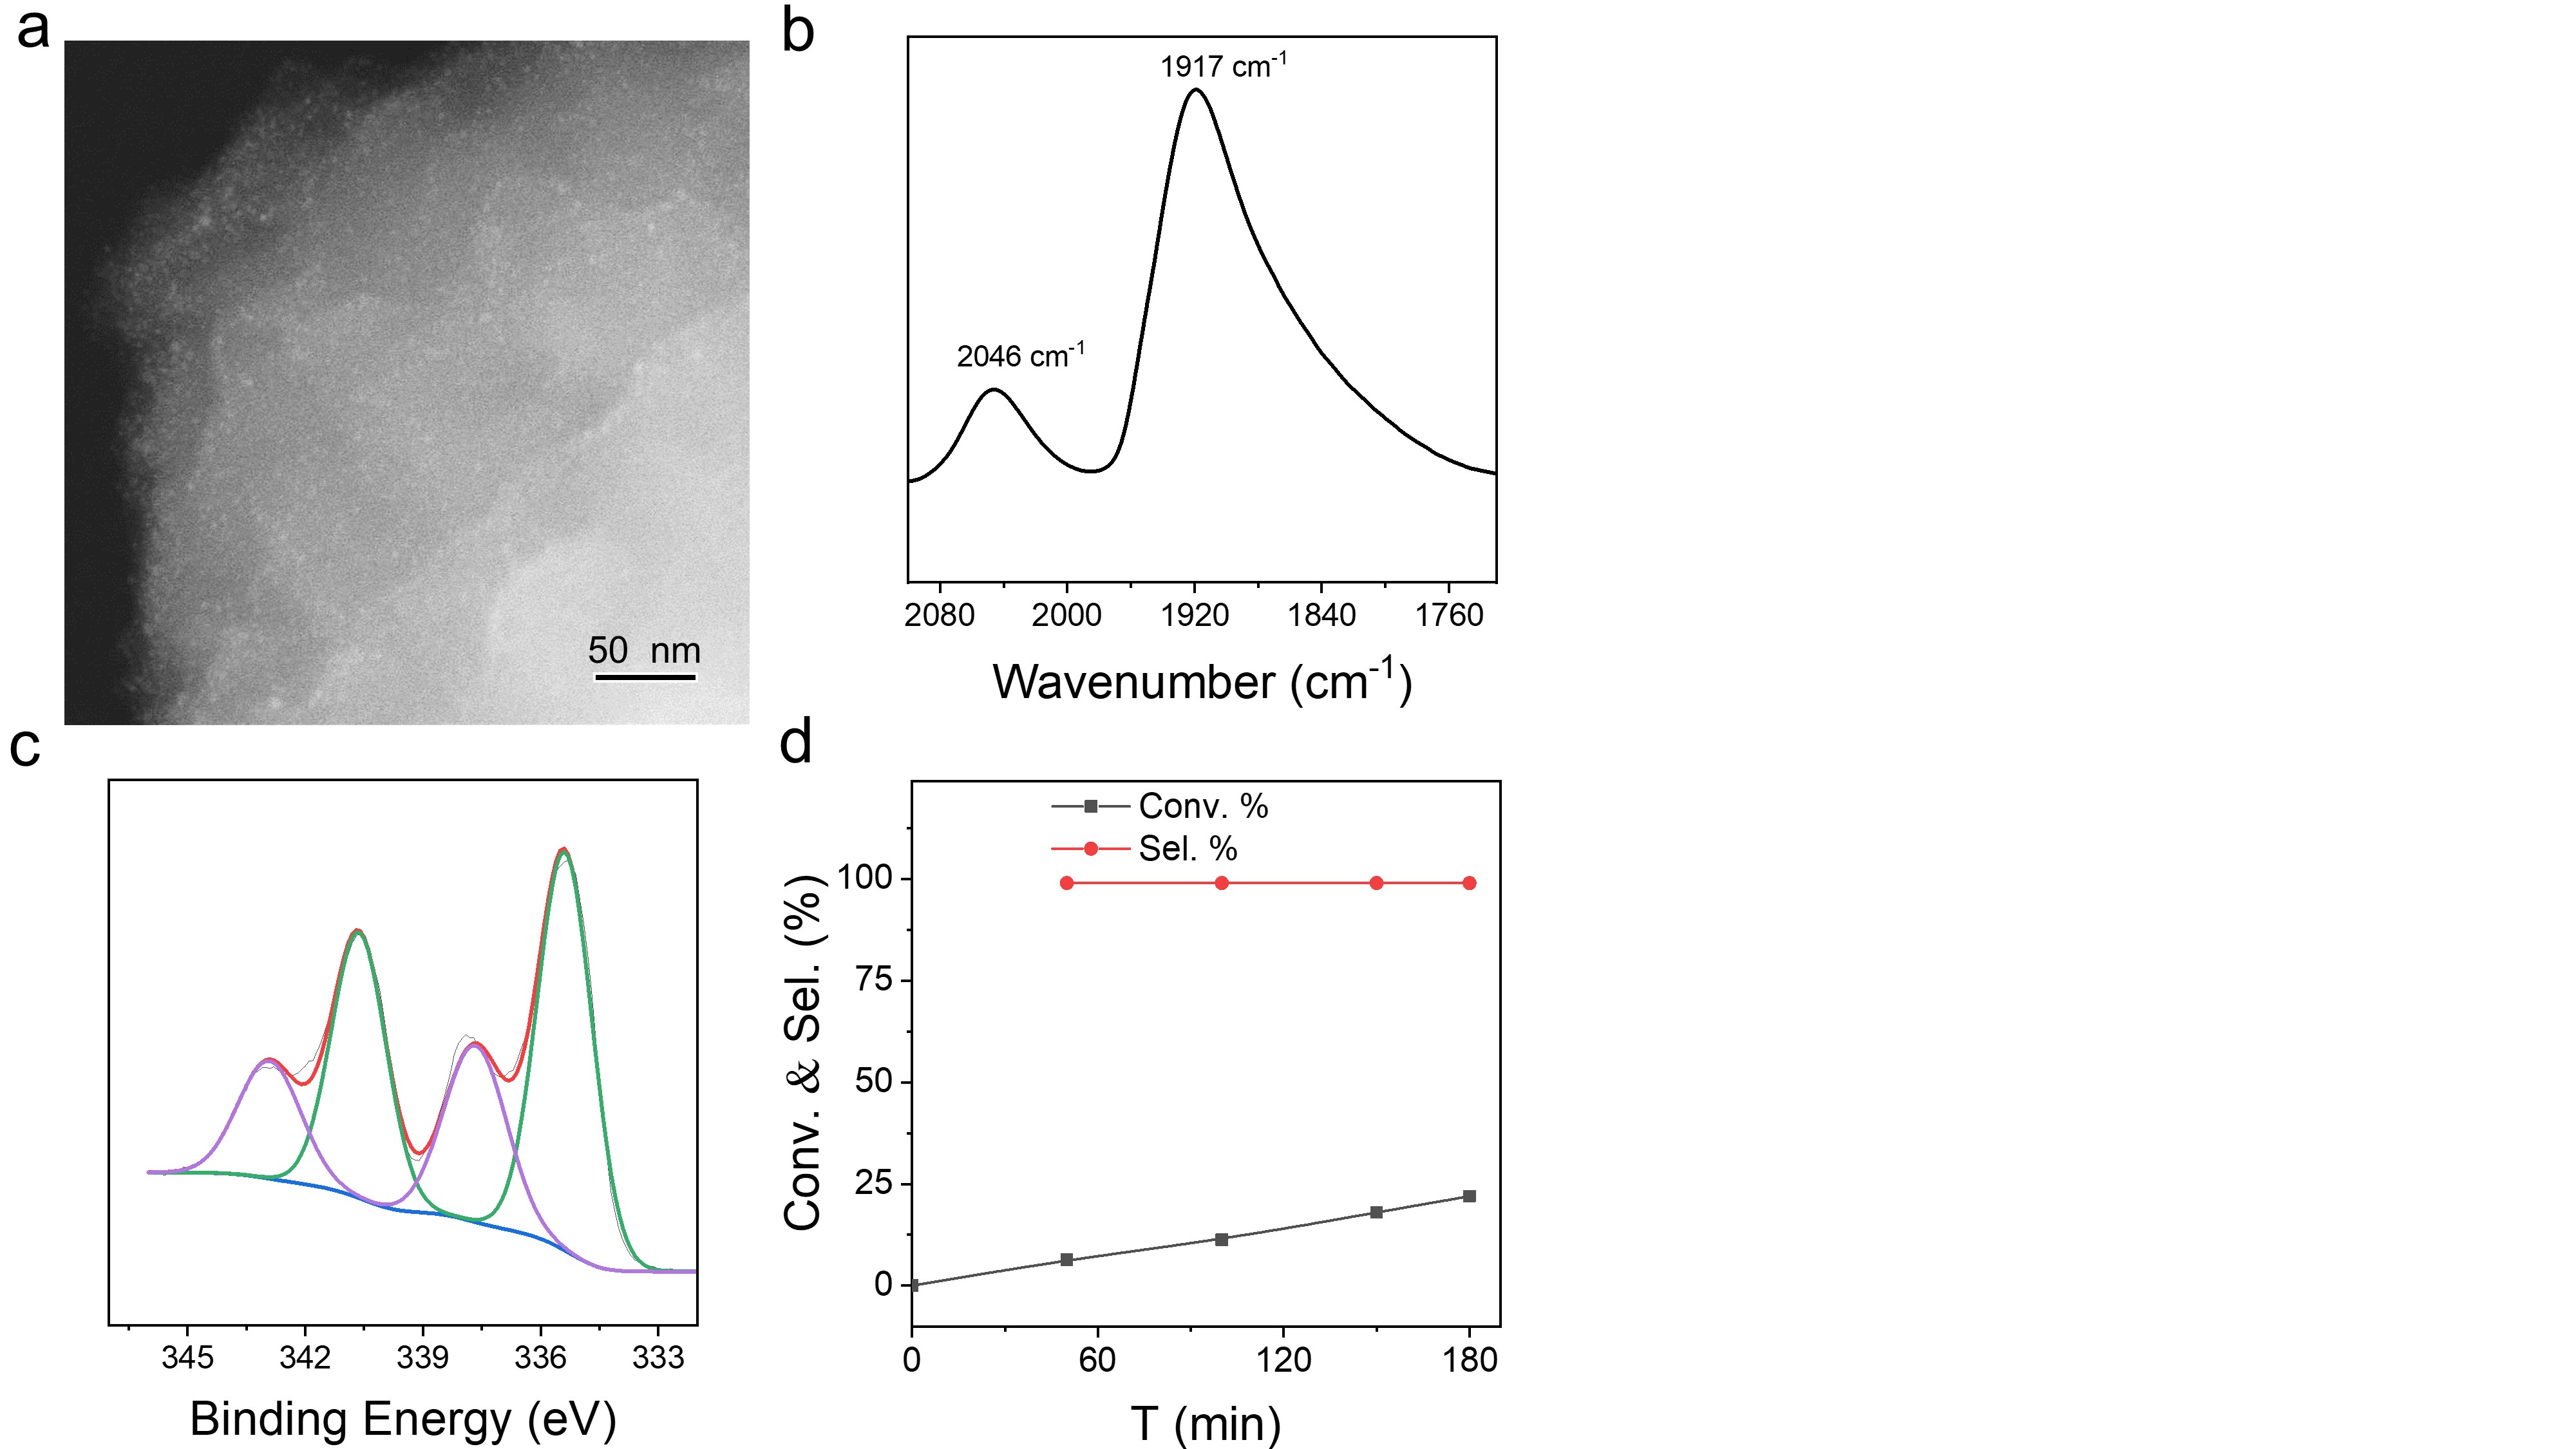


**Figure S5**. **a** HAADF-STEM image, **b** in situ FTIR of CO adsorption, **c** XPS and **d** AP hydrogenation results on Pd/TB-COF (40 oC, 10 bar H2).


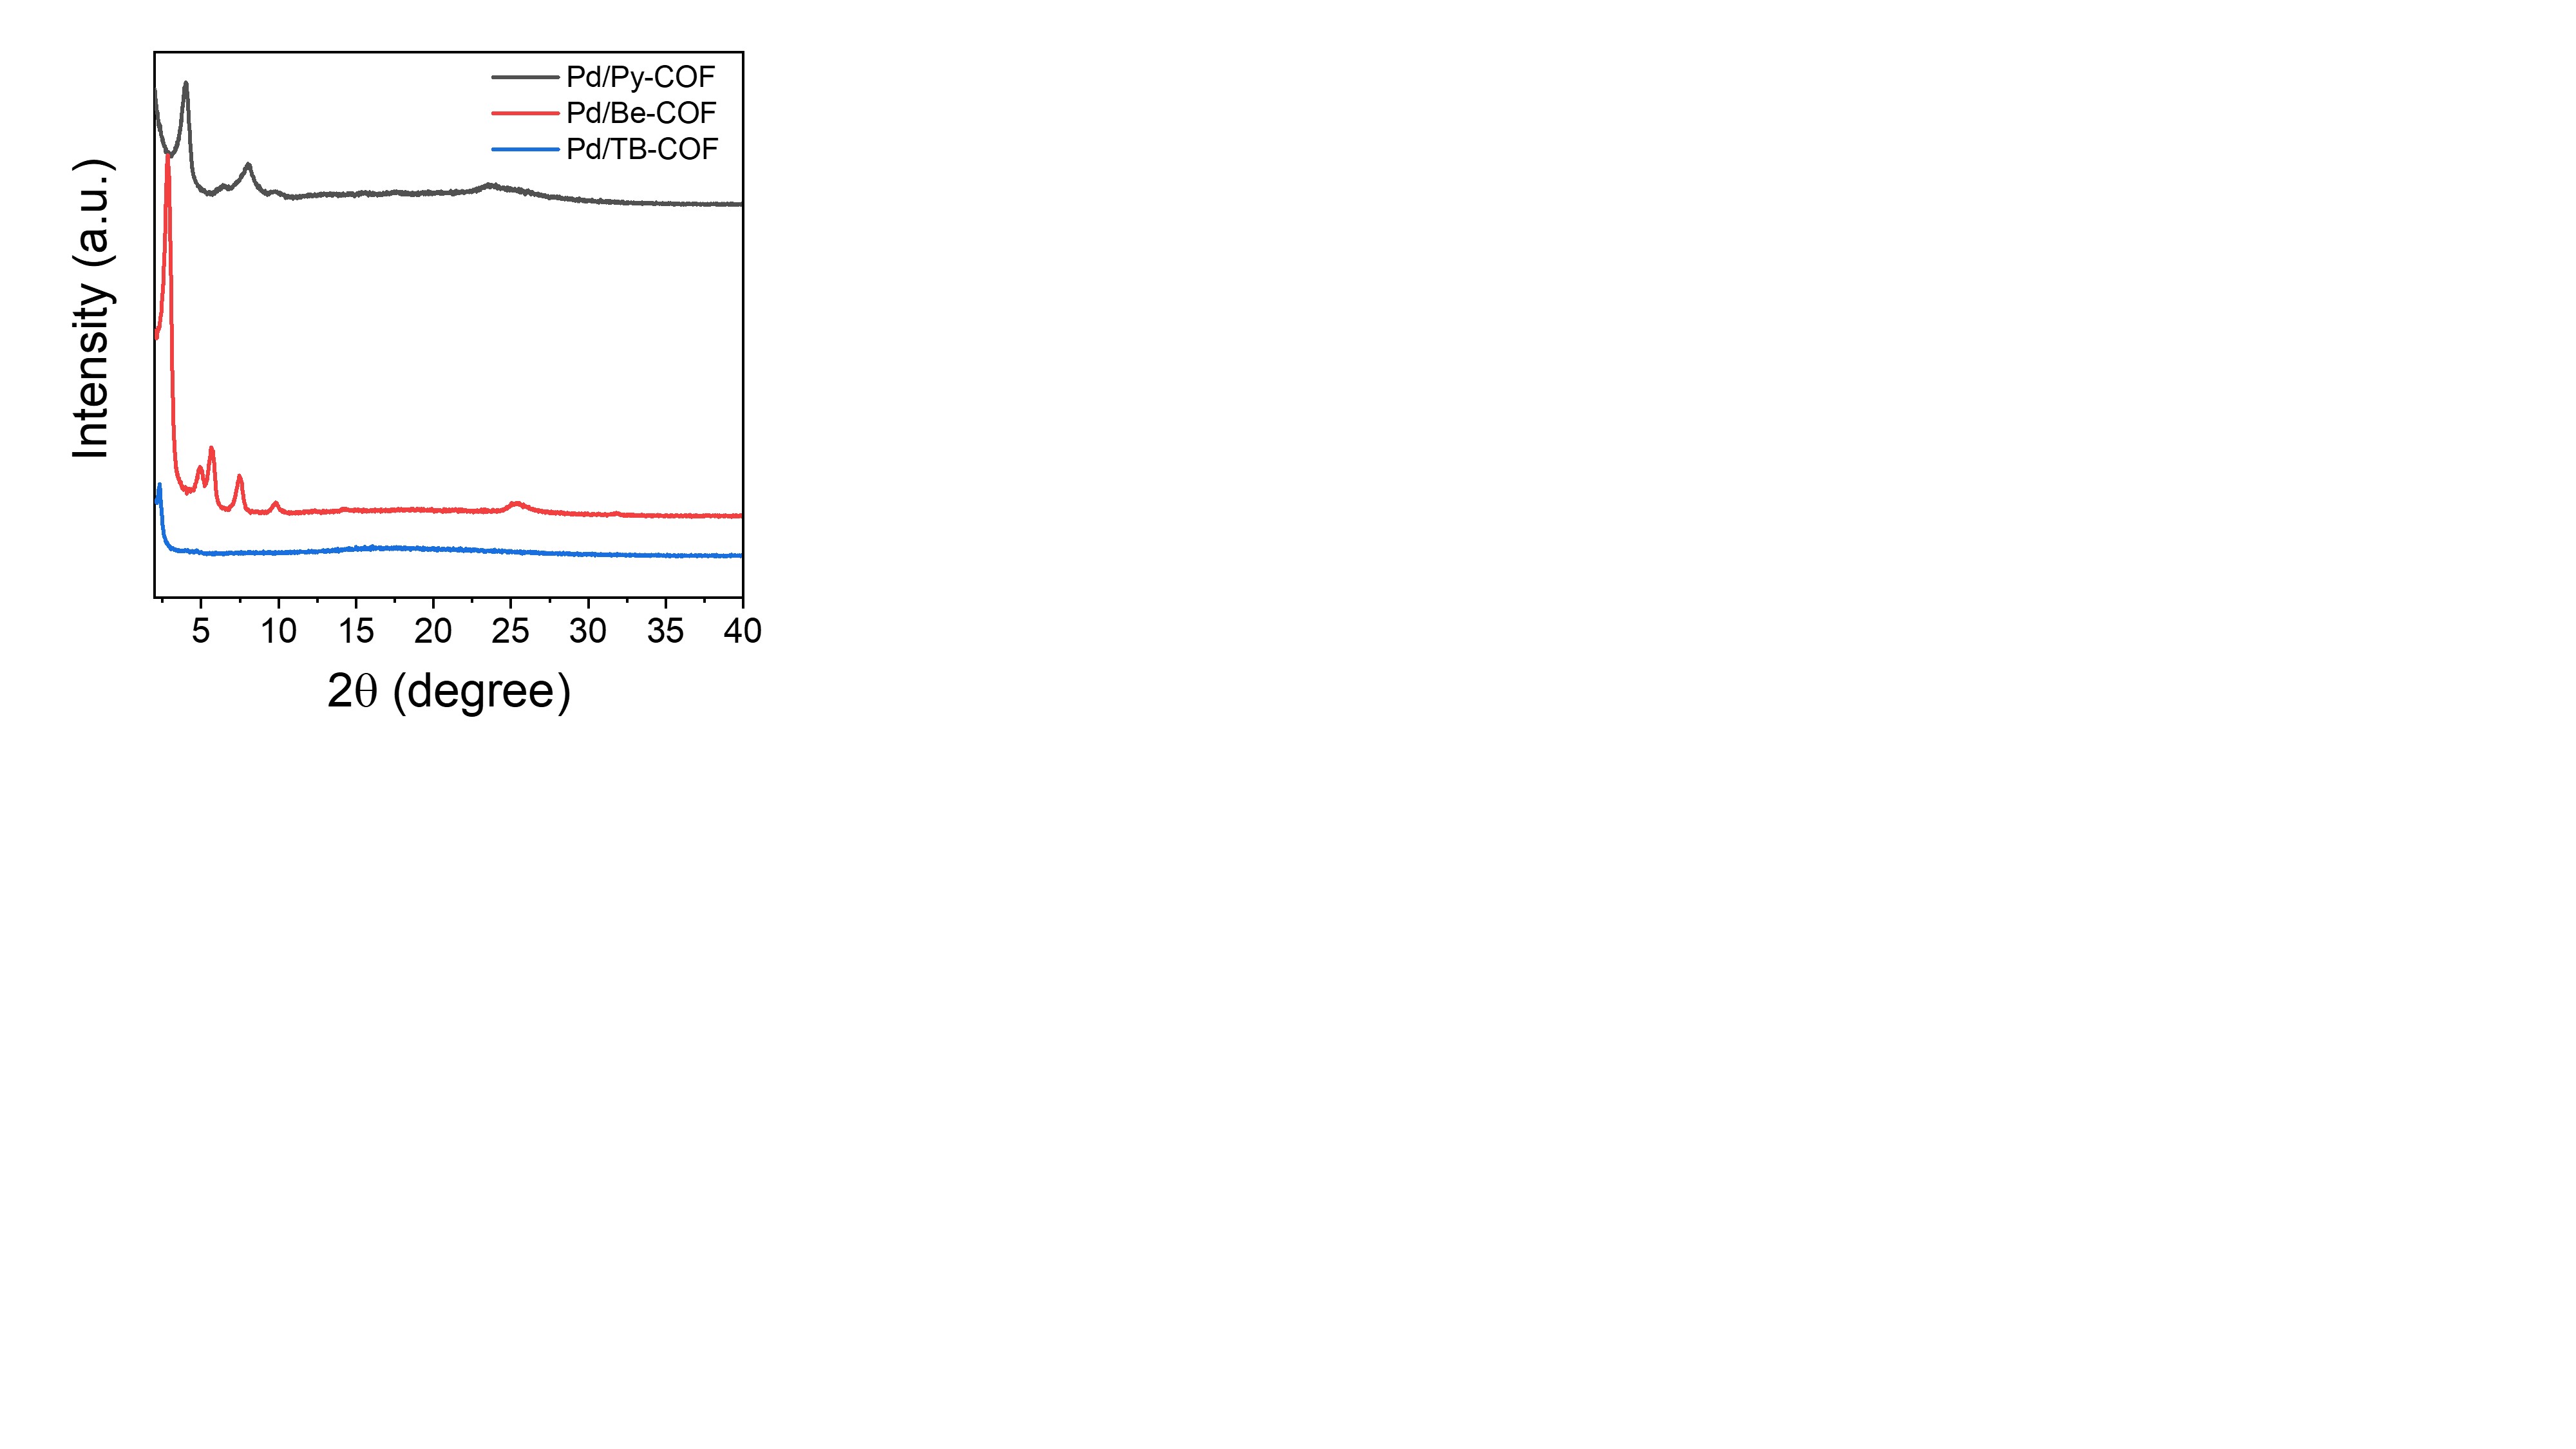


**Figure S6**. PXRD patterns of Pd/Py-COF, Pd/Be-COF and Pd/TB-COF.


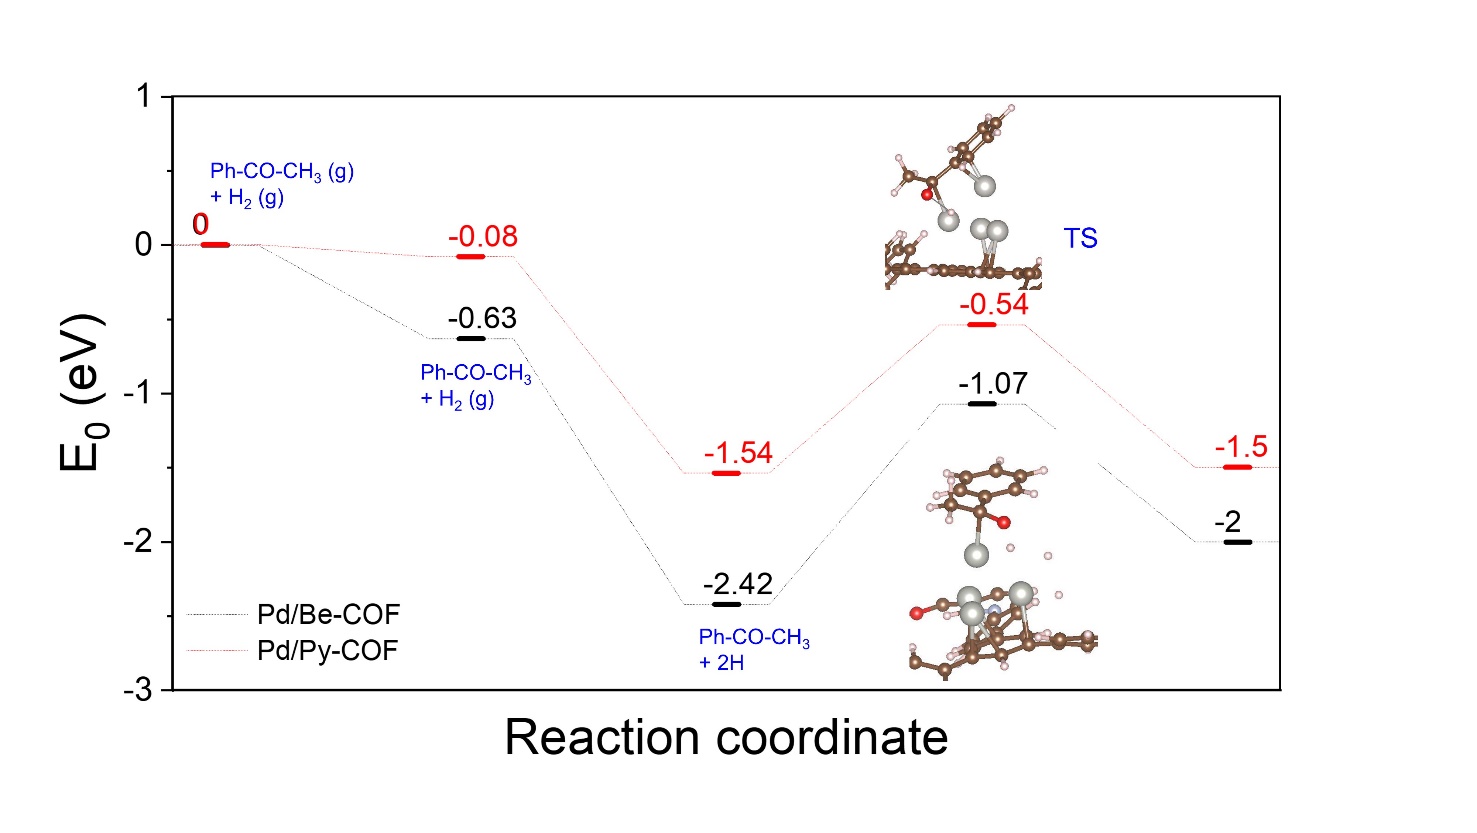


**Figure S7.** Calculated energy profile of the O hydrogenation step of AP hydrogenation on Pd/Be-COF (black) and Pd/Py-COF (red).


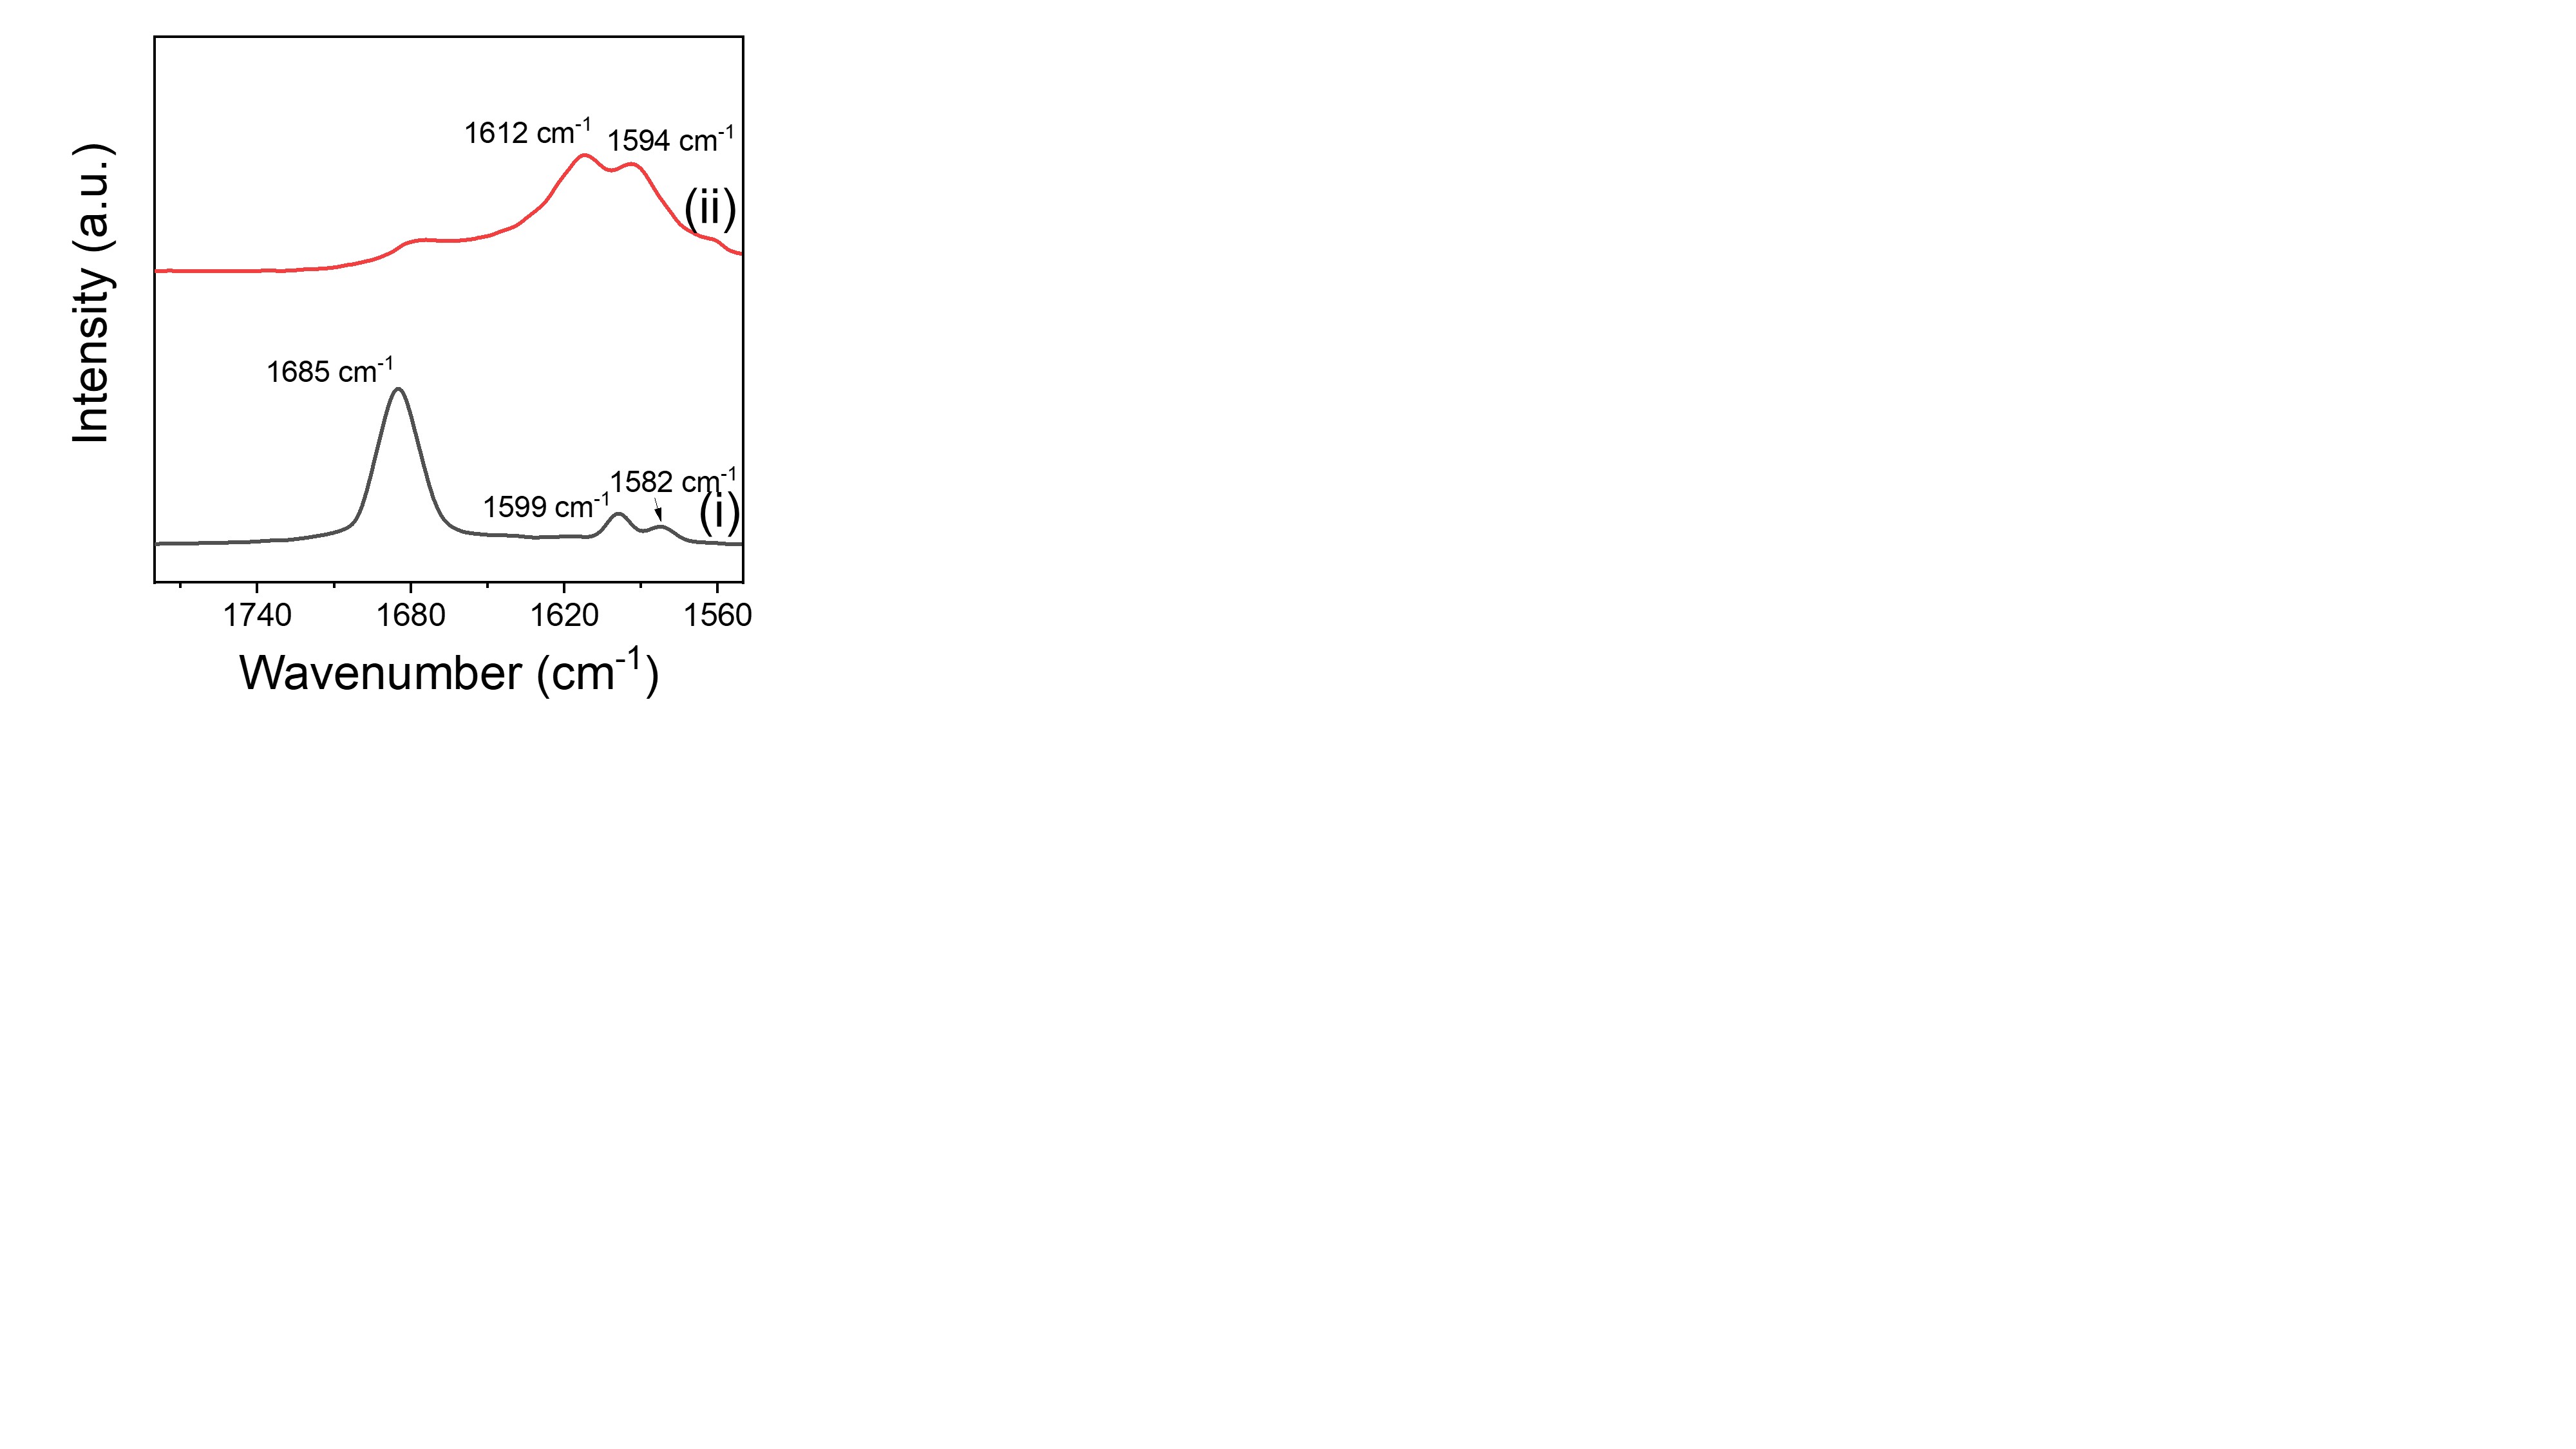


**Figure S8.** FT-IR spectra of (i) AP and (ii) Pd/Be-COF.


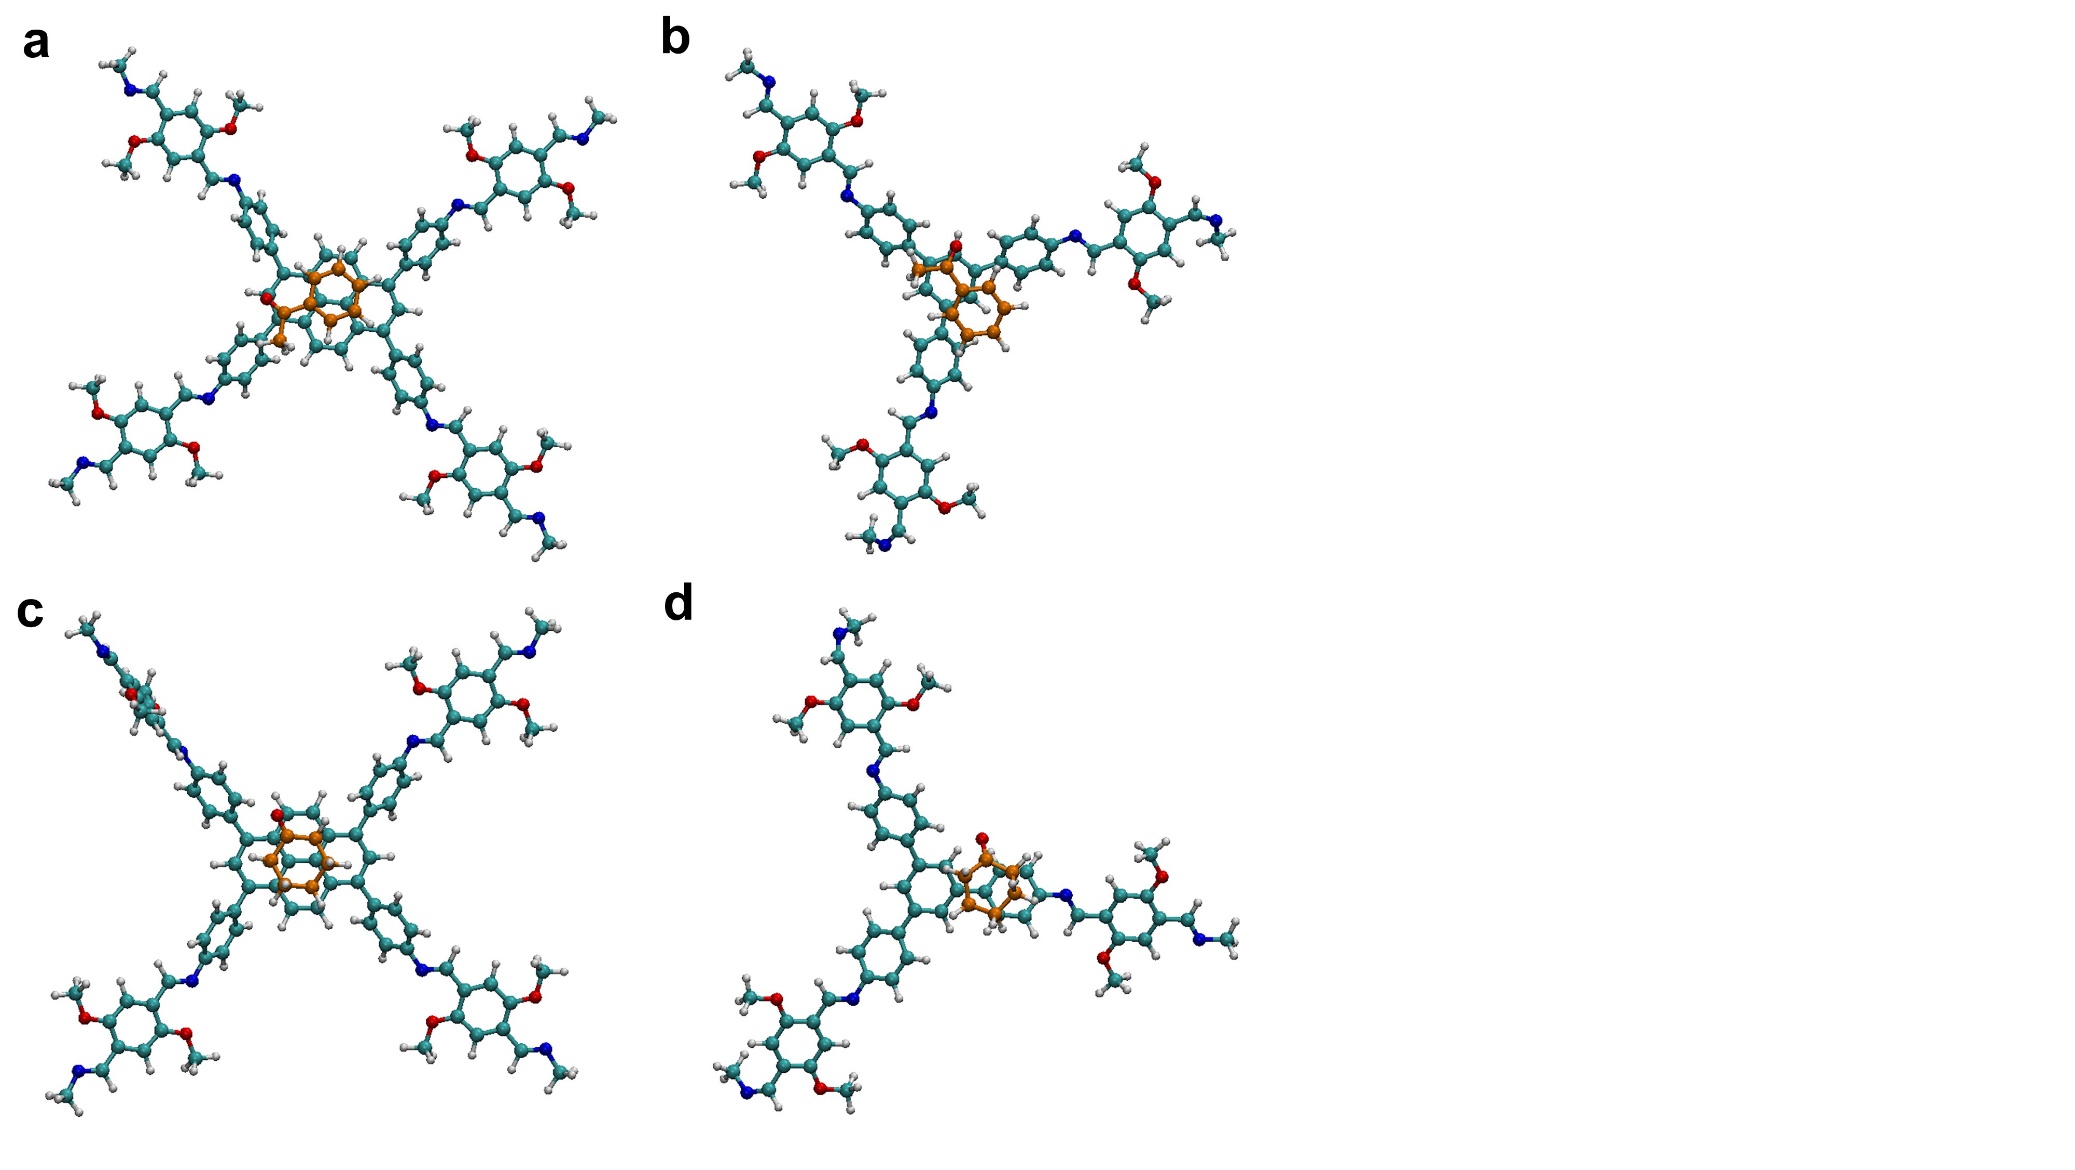


**Figure S9.** The models for the calculated interactions energies by DFT. **a** Py-COF/AP

**b** Be-COF/AP, **c** Py-COF/CHO and **d** Be-COF/CHO.


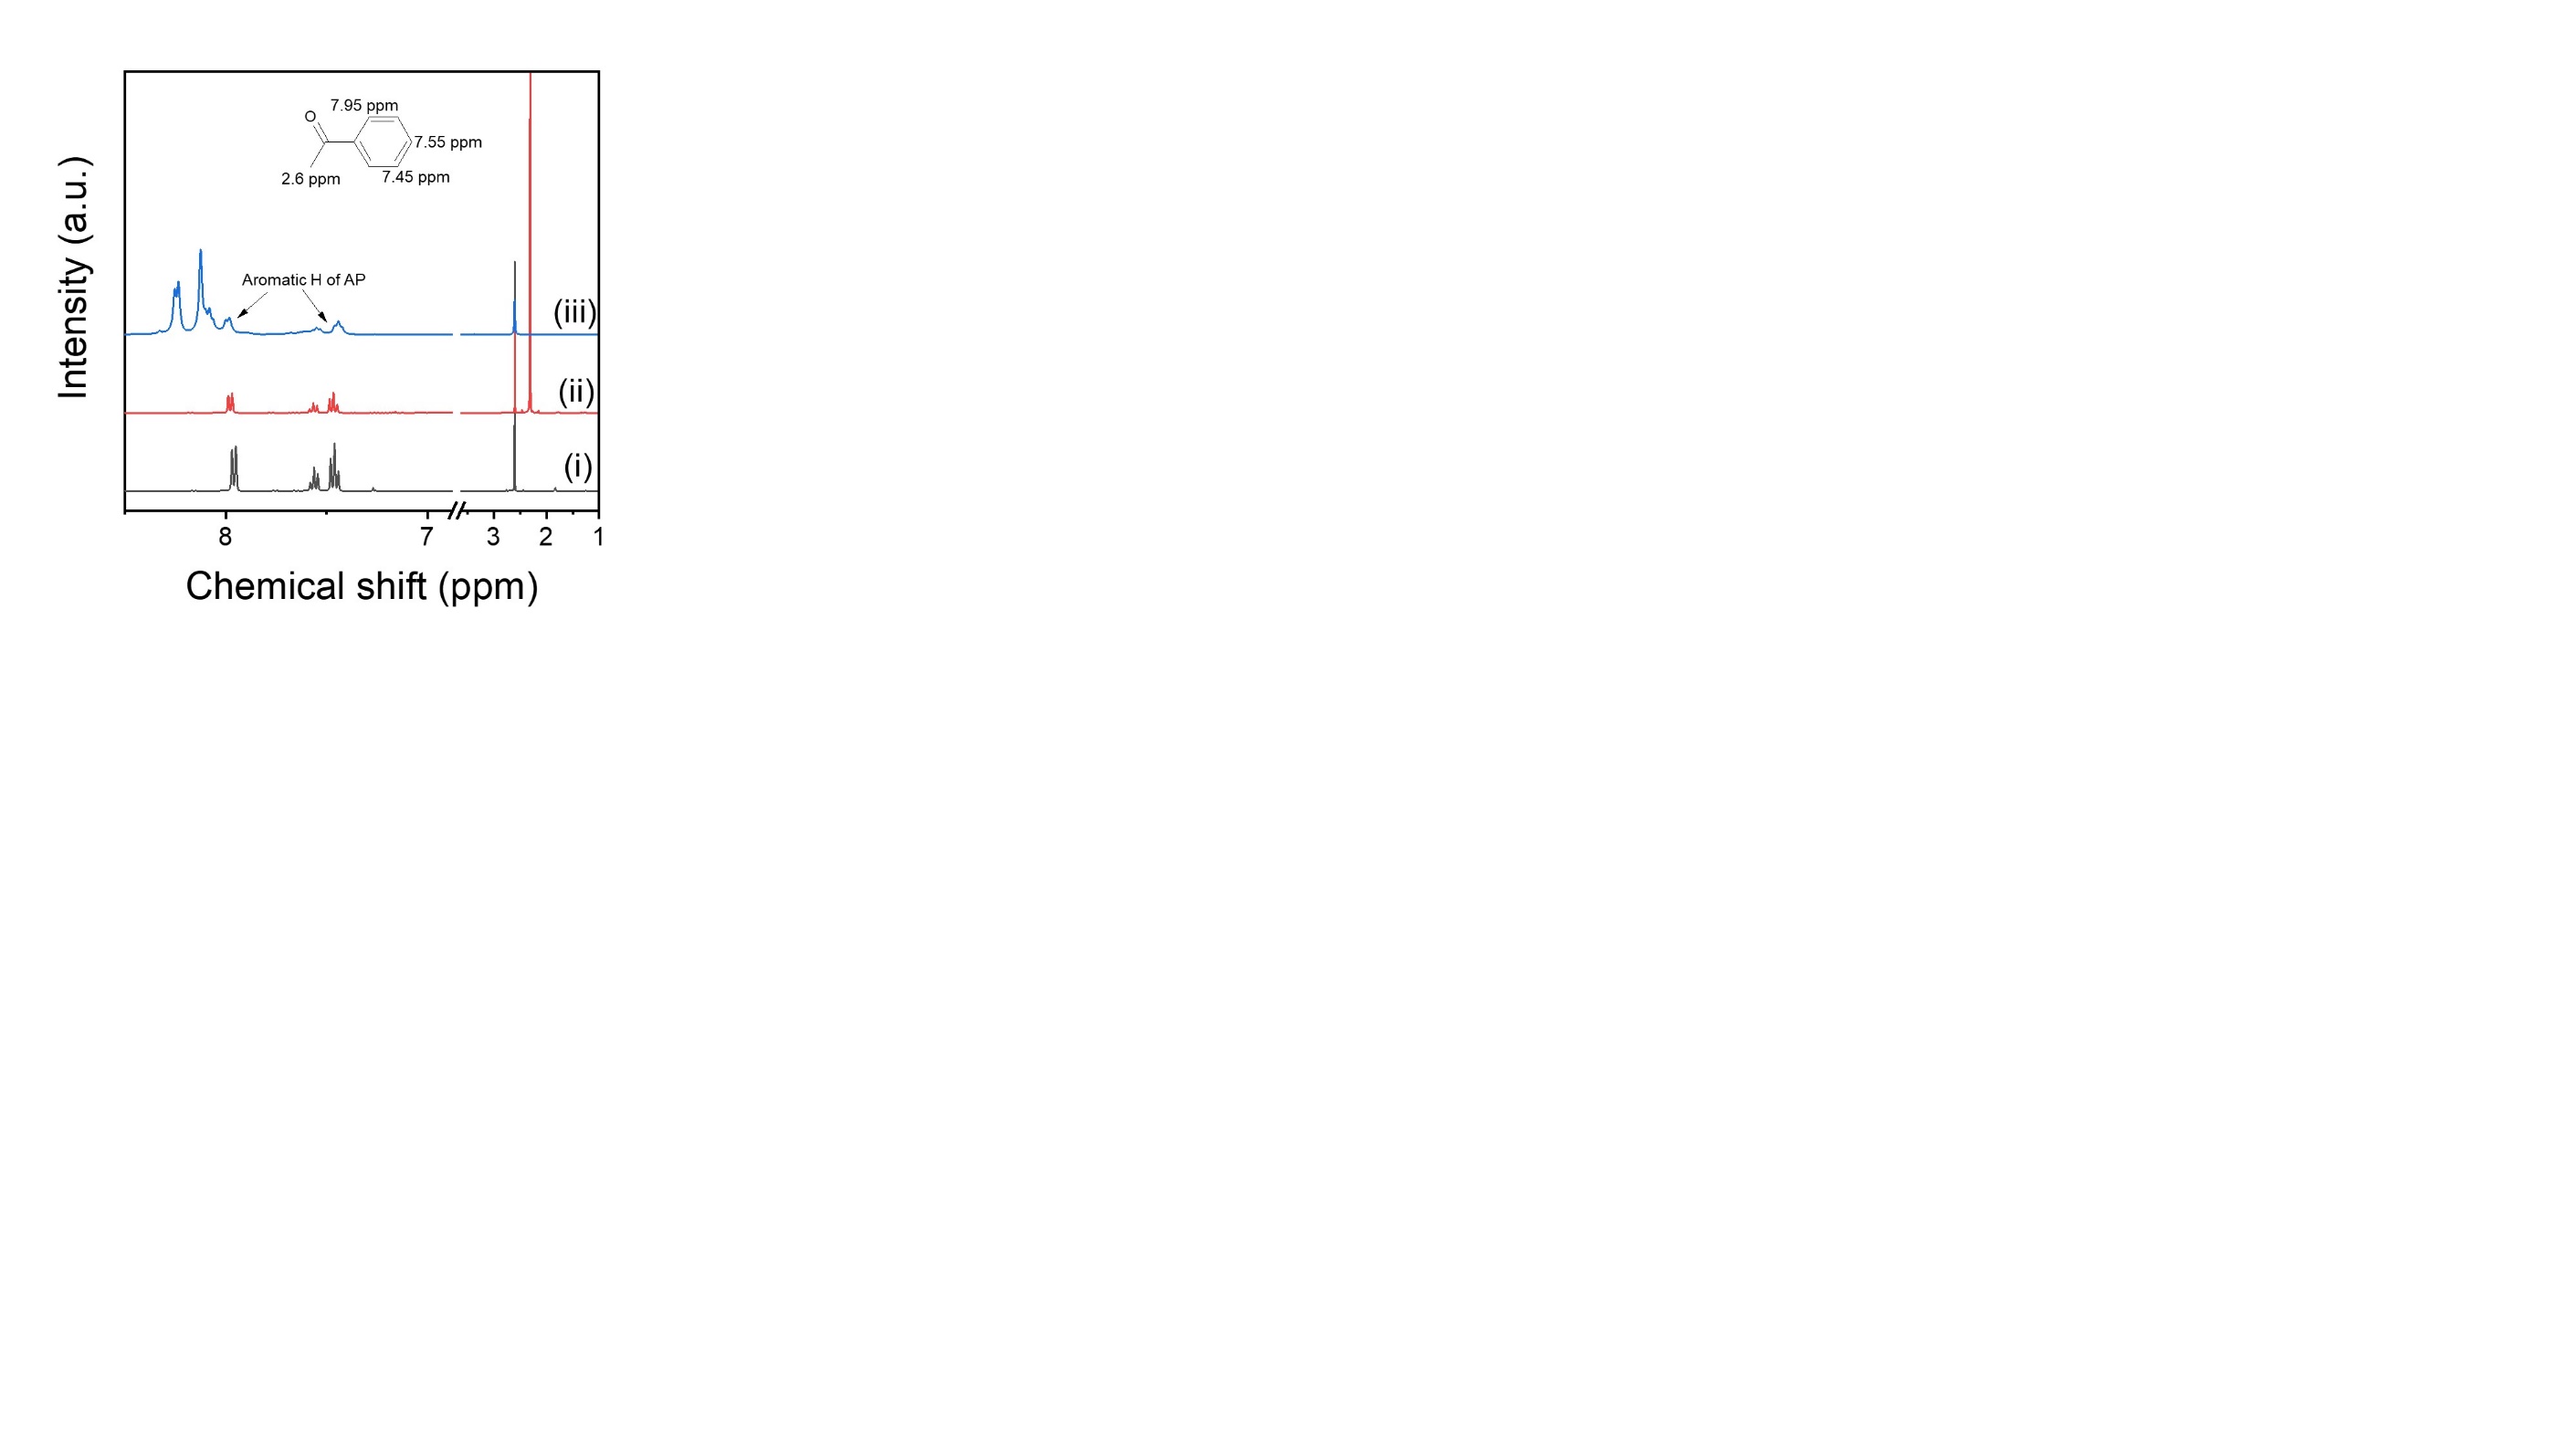


**Figure S10.** 1H**-**NMR spectra of (i) AP, (ii) AP + mesitylene (molar ratio: 1:2) and (iii) AP + pyrene (molar ratio: 1:2).


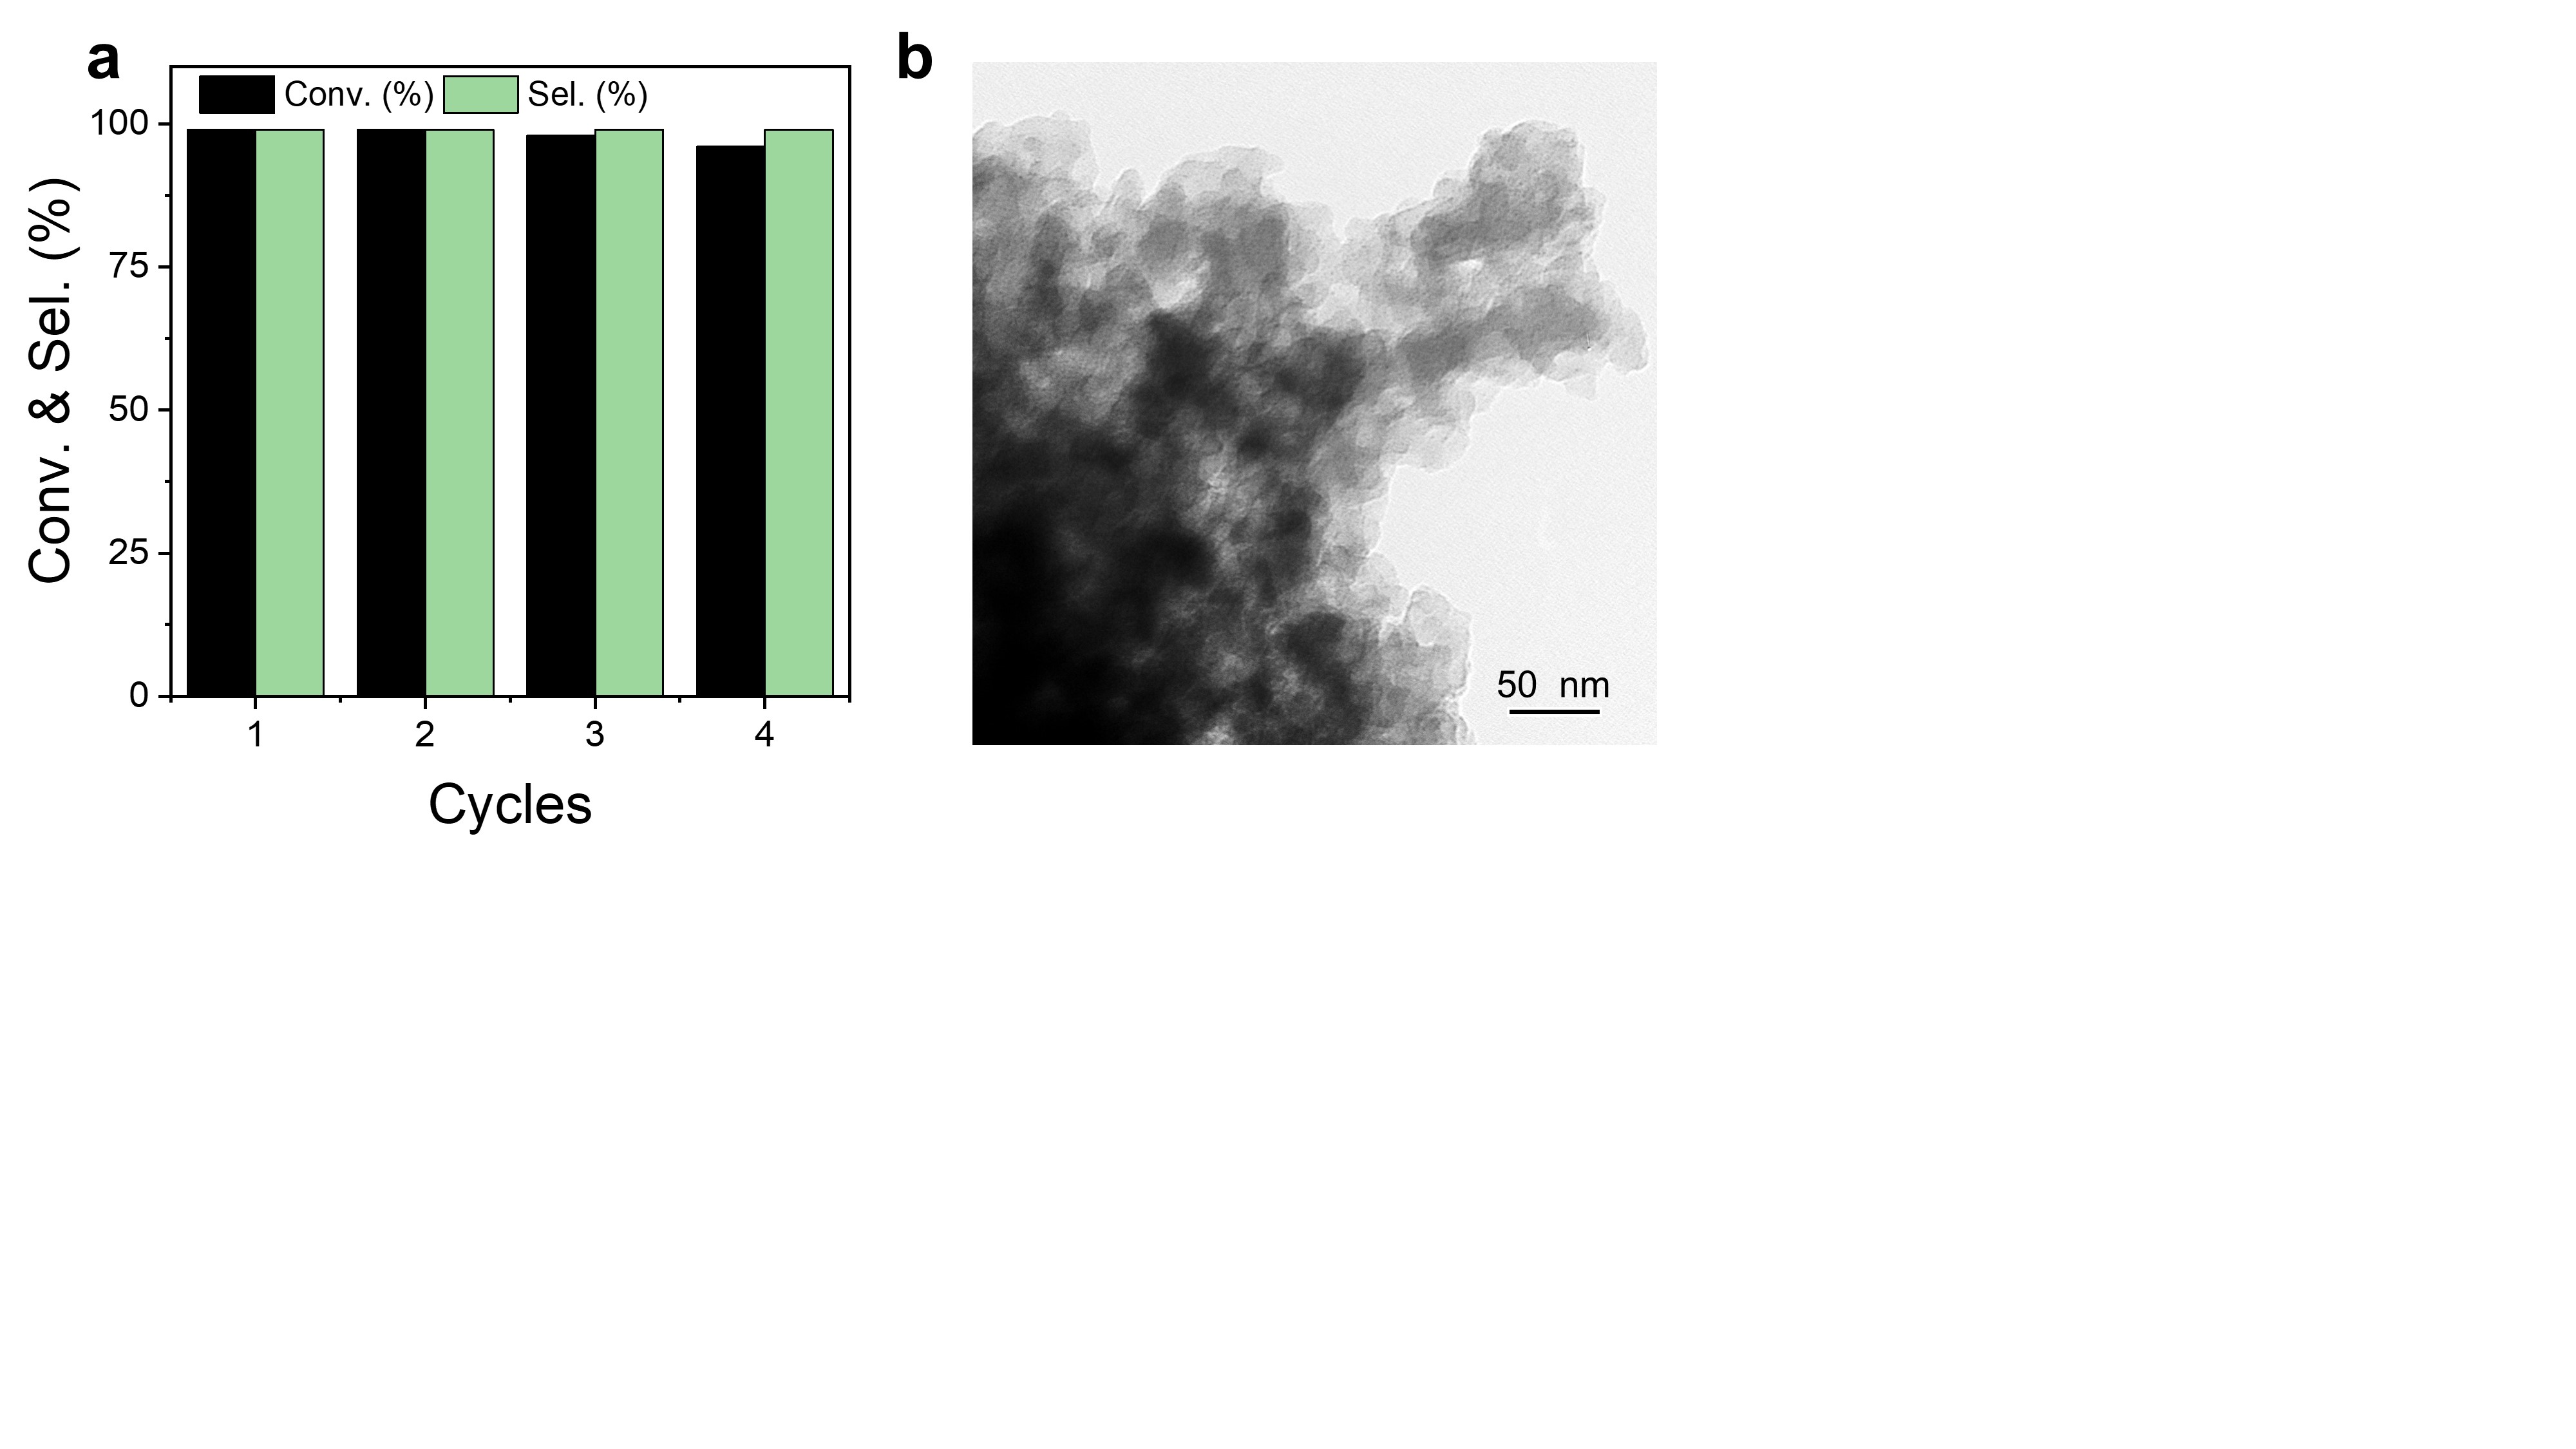


**Figure S11. a** Recycling stability of Pd/Py-COF in AP hydrogenation, **b** TEM image of Pd/Py-COF after the fourth cycle.

**References**

1. Kresse, G. & Furthmüller, J. Efficiency of Ab-initio total energy calculations for metals and semiconductors using a plane-wave basis set. *Comput. Mater. Sci.* **6**, 15−50 (1996).
2. Kresse, G. & Furthmüller, J. Efficient lterative schemes for Ab initio total-energy calculations using a plane-wave basis set. *Phys. Rev. B* **54**, 11169−11186 (1996).
3. Perdew, J. P., Burke, K. & Ernzerhof, M. Generalized gradient approximation made simple. *Phys. Rev. Lett.* **77**, 3865−3868 (1996).
4. Kresse, G. & Joubert, D. From ultrasoft pseudopotentials to the projector augmented-wave method. *Phys. Rev. B* **59**, 1758-1775 (1999).
5. Blöchl, P. E. Projector augmented-wave method. *Phys. Rev. B* **50**, 17953−17979 (1994).
6. Grimme, S., Antony, J., Ehrlich, S. & Krieg, H. *J. Chem. Phys.* **132**, 154104 (2010).
7. Henkelman, G., Uberuaga, B. P. & Jonsson, H. *J. Chem. Phys.* **113**, 9901 (2000).
8. Henkelman, G. & Jonsson, H. *J. Chem. Phys.* **111**, 7010–7022 (1999).
9. Olsen, R. A., Kroes, G. J., Henkelman, G., Arnaldsson, A. & Jonsson, H. *J. Chem. Phys.* **121** 9776–9792 (2004).
10. Heyden, A., Bell, A. T. & Keil, F. J. *J. Chem. Phys.* **123**, 224101 (2005).
11. Frisch, M. J.; Trucks, G. W.; Schlegel, H. B.; Scuseria, G. E.; Robb, M. A.; Cheeseman, J. R.; Scalmani, G.; Barone, V.; Mennucci, B.; Petersson, G. A.; Nakatsuji, H.; Caricato, M.; Li, X.; Hratchian, H. P.; Izmaylov, A. F.; Bloino, J.; Zheng, G.; Sonnenberg, J. L.; Hada, M.; Ehara, M.; Toyota, K.; Fukuda, R.; Hasegawa, J.; Ishida, M.; Nakajima, T.; Honda, Y.; Kitao, O.; Nakai, H.; Vreven, T.; Montgomery, J. A.; Peralta, Jr, J. E.; Ogliaro, F.; Bearpark, M.; Heyd, J. J.; Brothers, E.; Kudin, K. N.; Staroverov, V. N.; Keith, T.; Kobayashi, R.; Normand, J.; Raghavachari, K.; Rendell, A.; Burant, J. C.; Iyengar, S. S.; Tomasi, J.;. Cossi, M; Rega, N.; Millam, J. M.; Klene, M.; Knox, J. E.; Cross, J. B.; Bakken, V.; Adamo, C.; Jaramillo, J.; Gomperts, R.; Stratmann, R. E.; Yazyev, O.; Austin, A. J.; Cammi, R.; Pomelli, C.; Ochterski, J. W.; Martin, R. L.; Morokuma, K.; Zakrzewski, G. A. Voth, P. Salvador, J. J. Dannenberg, S. Dapprich, A. D. Daniels, O. Farkas, J. B. Foresman, V. G.; Ortiz, J. V.; Cioslowski, J.; Fox, D. J. Revision A. 02; 2009.
